# Supplementary material
Source: publisher figshare collection journal article supplement (https://gsajournals.figshare.com/articles/dataset/_/7506041)
Supplement: Supplementary file 1 [file 1]

## Sheet: genotype data
					Early lines																Late lines
SNP_Marker	Chr	Position (bp)	A58	Kitaake	129	102	135	174	134	116	148	136	115	4	87	105	107	128	116*		25	51	1	74	141*	37	127	79	28	26	71	36	8	7	112
C1_5698	chr01	741567	G	T	G	T	T	G	G	G/T	T	G	G/T	G/T	G	G	T	-	G		T	T	T	G	G	G	T	G	G	T	G	G	T	G	G/T
C1_5699	chr01	741677	C	G	C	G	G	C	C	C/G	G	C	C/G	C/G	C	C	G	-	C		G	-	G	C	C	G	G	C	C	G	C	C	G	C	C/G
C1_2387	chr01	2600237	T	C	T	C	C	T	C	C/T	C	T	C/T	T	T	T	T	-	C/T		C	C	C	T	C	C	C	T	C	C	T	C	C	C/T	T
C1_2496	chr01	2672039	T	A	T	A	A	T	A	T	A	T	A	T	T	T	T	-	T		A	-	A	T	A	A	A	T	A	A	T	A	A	A/T	T
C1_2871	chr01	2952301	G	A	G	A/G	A/G	G	A/G	G	A	G	A/G	A/G	G	G	G	-	G		A	A	A/G	G	A/G	A/G	A/G	G	A	A	G	A	A/G	A/G	G
C1_3230	chr01	3188506	G	C	-	G	-	G	G	G	G	G	G	G	G	G	G	-	G		G	-	G	G	G	-	G	G	G	G	G	G	G	G	G
C1_5262	chr01	4610161	G	C	G	G	G	G	G	G	G	G	G	G	G	G	-	-	G		-	-	G	G	G	-	G	G	G	G	G	G	G	G	G
C1_5307	chr01	4906539	T	A	-	A	A	A	A	A	A	A	A	A	A	A	A	-	A		A	A	A	A	A	A	A	A	A	A	A	A	A	A	A
C1_5314	chr01	4928018	T	G	G	G	G	G	G	G	G	G	G	G	G	G	-	-	G		G	-	G	-	G	-	G	G	G	G	G	G	G	G/T	G
C1_5375	chr01	5275724	T	A	A/T	A	A	T	A	T	A	T	A/T	T	T	T	T	-	T		A	-	T	T	A	A	A	T	A	A	T	T	T	A/T	T
C1_5624	chr01	6794531	T	G	T	T	T	T	T	T	T	T	T	T	T	T	T	-	T		T	T	T	T	T	-	T	T	T	T	T	T	T	T	T
C1_5788	chr01	8055364	G	T	G	G	T	T	T	G	G	G	G	T	G	G	G	-	G		T	-	T	G	T	T	G	G	-	G	T	T	G/T	T	G
C1_5883	chr01	8764973	A	C	A	A	A/C	C	C	A	A	A	A/C	A	A	C	A	-	A		C	A	A/C	A	C	C	A	A	C	A/C	C	C	A	C	A
C1_5895	chr01	8894186	C	T	T	T	T	T	T	T	T	T	T	T	T	T	T	-	T		T	-	T	T	T	T	T	T	T	T	T	T	T	T	T
C1_5910	chr01	8966954	T	G	G	G	G	G	G	G	G	G	G	G	G	G	-	-	G		G	-	G	G	G	-	G	G	G	G	G	G	G	G	G
C1_176	chr01	11212317	G	T	G	G	G	G	G	G	G	G	G	G	G	G	-	-	G		G	-	G	G	G	-	G	G	G	-	G	G	G	G	G
C1_225	chr01	11553766	T	G	G/T	-	T	G	G	G	G	G/T	G/T	G	G/T	G	G	-	G		-	-	G	T	G	G	G	G	G	G	G	G	-	G	G/T
C1_238	chr01	11639733	G	C	G	G	G	G	C	C/G	C	C/G	G	C/G	G	C/G	G	-	C		G	-	C/G	C/G	G	G	G	C/G	G	G	G	G	C/G	G	C/G
C1_381	chr01	12431276	T	G	G	G	G	G	G	G	G	G	G	G	G	G	G	-	G		G	-	G	G	G	G	G	G	G	G	G	G	G	G	G
C1_577	chr01	13686335	T	A	T	T	T	T	-	T	T	T	T	T	T	T	-	-	T		T	-	-	T	T	T	T	T	T	T	T	T	T	T	T
C1_682	chr01	14175818	T	A	T	A	A/T	A/T	A	T	T	A	T	A	T	A/T	T	-	T		T	T	A/T	T	T	A	T	A/T	A/T	A	A	A	T	T	T
C1_750	chr01	14627266	T	C	C/T	C	C/T	C/T	C	T	T	C	C/T	C	T	C/T	T	-	T		T	T	C/T	T	T	C	T	C/T	C/T	C	C	C	T	T	T
C1_824	chr01	15180801	G	A	A	A	A	A	A	A	A	A	A	A	A	A	A	-	A		A	-	A	-	A	A	A	A	A	A	A	A	A	A	A
C1_1045	chr01	16692884	A	G	A	A	A	A	A	A	A	A	A	A	A	A	A	-	A		A	A	A	A	A	A	A	A	A	A	A	A	A	A	A
C1_1109	chr01	17157067	G	A	G	G	-	G	G	G	G	G	G	G	G	G	G	-	G		G	G	G	G	G	G	G	G	G	G	G	G	G	G	G
C1_1112	chr01	17181000	C	T	T	T	T	T	T	T	T	T	T	T	T	T	T	-	T		T	-	T	-	T	T	T	T	T	T	T	T	T	T	T
C1_1117	chr01	17196881	C	T	C/T	T	C/T	C/T	T	C	C	T	C	T	C	C/T	C	-	C		C	C	C/T	C	C	T	C	C/T	C/T	T	T	T	C	C	C
C1_1123	chr01	17220699	T	G	T	T	T	T	T	T	T	T	T	T	T	T	T	-	T		T	G	T	T	T	T	T	T	T	T	T	T	T	T	T
C1_1440	chr01	19422029	C	T	C	C	C	C	C	C	C/T	C/T	C/T	C/T	C/T	C/T	C	-	C/T		C	C	C/T	T	C/T	C/T	C/T	C/T	C/T	C	C	C	C/T	C/T	C
C1_1563	chr01	20368893	G	T	T	T	T	T	T	T	T	T	T	-	T	T	-	-	-		T	-	T	T	T	T	T	T	T	T	T	T	T	T	T
C1_1713	chr01	21274262	C	A	A	A	A	A	A	A	A	A	A	A	A	A	-	-	A		A	A	A	A	-	A	A	A	A	A	A	A	A	A	A
C1_1829	chr01	22084849	T	A	-	T	T	T	T	T	T	T	T	-	T	T	T	-	T		T	T	T	T	T	-	T	T	T	T	T	T	T	T	T
C1_1891	chr01	22551242	C	G	C	C	G	C	C	C	G	C/G	C	G	G	G	-	-	G		C	-	C	-	G	G	C	C	C/G	G	G	G	-	G	C
C1_1907	chr01	22655254	G	C	C	C	C	G	-	G	C	C	-	-	C	C	C	-	G		-	C	C	C	C	C	C	C	C	C	C	C	G	C	C
C1_2021	chr01	23312758	T	C	T	T	T	T	T	T	T	T	T	T	T	T	T	-	T		T	-	T	T	T	T	T	T	T	T	T	T	T	T	T
C1_2082	chr01	23767090	T	A	T	T	A	T	A/T	T	T	A	T	T	T	A	T	-	A		T	T	A	A	T	A	T	A	T	A	A	A	T	A	T
C1_2228	chr01	24877241	A	T	T	T	T	T	T	T	T	T	T	T	T	T	T	-	T		T	-	T	T	T	T	T	T	T	T	T	T	T	T	T
C1_2292	chr01	25250821	G	A	G	G	A/G	G	G	A/G	A/G	A	G	G	G	G	G	-	A/G		G	G	A	A/G	G	A	G	A	A/G	A	G	A/G	G	A	A
C1_2301	chr01	25270205	G	A	G	G	A/G	G	G	A/G	A/G	A	G	G	G	G	G	-	A/G		G	G	A	A/G	G	A	G	A	A/G	A	G	A/G	G	A	A
C1_2342	chr01	25553531	G	A	A	A	A	A	A	A	A	A	A	A	A	A	A	-	A		A	A	A	A	A	A	A	A	A	A	A	A	A	A	A
C1_2425	chr01	26226203	A	C	A	A/C	C	A	A/C	A	A	A	A/C	A	A	A	-	-	-		A/C	-	C	A	A/C	C	A/C	A	A/C	A/C	A	A/C	A/C	A/C	A
C1_2471	chr01	26592061	T	G	T	T	T	T	T	T	T	T	T	T	T	T	T	-	T		T	T	T	G/T	T	T	T	T	T	T	T	T	T	T	T
C1_2745	chr01	28608975	G	A	G	G	G	G	G	A/G	A/G	A	G	G	G	G	G	-	A/G		G	-	A	A	G	A	G	A	G	A	A/G	G	G	A	A
C1_2968	chr01	30128355	T	C	C/T	T	T	T	T	T	C/T	C	C/T	T	T	C	T	-	T		T	-	C	C	C/T	C	T	C	T	C	C/T	C/T	T	C	C/T
C1_3128	chr01	31132757	C	T	T	T	-	T	T	T	T	T	T	T	T	T	T	-	T		T	T	T	T	T	T	T	T	T	T	T	T	T	T	T
C1_3141	chr01	31239740	G	T	T	T	T	T	-	T	T	T	T	T	T	T	-	-	T		T	-	T	T	T	T	T	T	T	-	T	T	T	T	T
C1_3278	chr01	32139074	G	T	T	T	T	T	T	T	T	T	T	T	T	T	T	-	T		T	-	T	T	T	-	T	T	T	T	T	T	T	T	T
C1_3381	chr01	32828309	T	C	C/T	C/T	C	C	C	C/T	C	C	C	C	C/T	C	C	-	C		C	-	C/T	C/T	C/T	C	C/T	C	C/T	C/T	C/T	C/T	C	C/T	C
C1_3392	chr01	32874268	T	C	T	T	T	T	T	T	T	T	T	T	T	T	T	-	T		T	T	T	T	T	T	T	T	T	T	T	T	T	T	T
C1_3732	chr01	34324104	T	G	T	T	T	T	T	T	T	T	T	T	T	T	-	-	T		T	-	T	T	T	T	T	T	T	T	T	T	T	T	T
C1_4164	chr01	36918610	C	T	C	C	-	C	T	C	C	C	T	-	C	C	C	-	C		C	C	T	C	T	C	T	C/T	C	C	C/T	C	C	C	T
C1_4443	chr01	38591410	C	T	C	C	C	C	C	C	C	C	C	C	C	C	-	-	C		C	-	C	C	C	C	-	C	C	C	C	C	C	C	C
C1_4728	chr01	40036301	A	T	T	T	T	T	T	T	T	T	T	T	T	T	T	-	T		T	-	T	T	-	-	T	T	T	T	T	T	T	T	T
C1_4747	chr01	40152431	G	A	A	A	A	A	A	A	A	A	A	A	A	A	A	-	A		A	A	A	A	A	A	A	A	A	A	A	A	A	A	A
C1_4790	chr01	40368994	G	A	A	A	A	A	A	A	A	A	A	A	A	A	G	-	A		A	-	A	A	A	A	A	A	A	A/G	A	A	A	A	A
C1_4954	chr01	41251907	T	C	C	C	C	T	C	T	T	C	T	C	T	T	T	-	T		C	C	C	C	C	T	C	T	C	T	T	T	T	T	C/T
C1_5070	chr01	41988399	T	G	T	T	T	T	T	T	T	T	T	T	T	T	T	-	T		T	-	T	T	T	T	T	T	T	T	T	T	T	T	T
C1_5157	chr01	42639616	A	C	C	C	C	A/C	A	C	A	C	A/C	C	A/C	A	A	-	A		C	C	A/C	C	C	A	A	C	C	A	A	A	A	A	A
C2_10782	chr02	790734	C	A	A	C	C	C	C	C	A/C	C	C	C	C	A	C	-	C		A	C	A	A	A	C	C	C	A	A	C	A	A	A	A
C2_10784	chr02	790866	T	C	C	T	T	T	T	T	C/T	T	T	T	T	C	T	-	T		C	T	C	C	C	T	T	T	C	C	T	C	C	C	C
C2_7018	chr02	1552794	A	C	C	C	C	C	C	C	C	C	C	C	C	C	C	-	C		C	-	C	C	C	C	C	C	C	C	C	C	C	C	C
C2_7673	chr02	1987042	G	T	T	T	T	T	T	T	T	T	T	T	T	T	T	-	T		T	-	T	T	T	T	-	T	T	T	T	T	T	T	T
C2_9415	chr02	3147636	A	T	A	T	A	A	A	A	A	A	A	A	A	A	A	-	A		A	-	A	A	A	A	A	A	A	A	A	A	A	A	A
C2_10155	chr02	3727038	T	C	T	T	T	T	T	T	T	T	T	T	T	T	-	-	T		T	-	T	T	T	T	T	T	T	T	T	T	T	T	T
C2_10388	chr02	5293203	C	G	G	G	G	G	G	G	G	G	G	G	G	G	G	-	G		G	-	G	G	G	G	G	G	G	G	G	G	G	G	G
C2_10455	chr02	5779476	T	G	G	G	-	G	G	G	G	G	G	G	G	G	-	-	G		G	-	G	G	G	G	-	G	G	G	G	G	G	G	G
C2_10474	chr02	5895259	T	G	T	T	T	T	T	T	T	T	T	T	T	T	T	-	T		T	-	T	T	T	T	T	T	T	T	T	T	T	T	T
C2_10489	chr02	5993920	C	T	T	T	T	T	T	T	T	T	T	T	T	T	T	-	T		T	T	T	T	T	T	T	T	T	T	T	T	T	T	T
C2_10552	chr02	6521884	C	T	T	T	C	T	C/T	T	T	C/T	C	C	T	C/T	C	-	T		C	C	C/T	C/T	C	C	C	C/T	T	T	T	T	T	T	C/T
C2_10717	chr02	7526817	A	G	G	G	A	G	G	G	G	G	A	A	G	A/G	A	-	G		A	-	G	A	A	G	A	G	A	G	G	G	G	G	G
C2_10767	chr02	7806464	G	T	T	T	T	T	T	T	T	T	T	T	T	T	T	-	T		T	-	T	T	T	T	T	T	T	T	T	T	T	T	T
C2_11173	chr02	9954693	A	T	A	A	A	A	A	A	A	A	A	A	A	A	A	-	A		-	A	A	A	A	A	A	A	A	A	A	A	A	A	A
C2_6049	chr02	10050839	C	A	A	A	C	A	C	A	A	A	A/C	C	C	A	-	-	-		C	-	A	C	C	A	C	A	C	A	A	A/C	A	A	C
C2_6175	chr02	10837802	C	T	T	T	T	T	T	T	T	T	T	T	T	T	T	-	T		T	T	T	T	T	T	T	T	T	T	T	T	T	T	T
C2_6293	chr02	11601529	G	A	G	G	G	G	G	G	-	G	G	G	G	G	G	G	G		G	G	G	G	G	G	G	G	G	G	G	G	G	G	G
C2_6677	chr02	14139500	T	C	C/T	C	T	C	C/T	C	C	C	C/T	T	T	C/T	T	-	C		T	C	C	T	T	T	T	C	T	C	C	C/T	C/T	C	T
C2_6736	chr02	14251574	T	A	A	A	A	A	A	A	A	A	A	A	A	A	A	-	A		A	A	A	A	A	A	A	A	A/T	A	A	A	A	A	A
C2_6968	chr02	15289736	G	T	G/T	T	G	T	G	G/T	T	G/T	G	G	G	G/T	G	-	T		G	-	T	G	G	G	G	T	G	T	T	T	T	T	G
C2_7024	chr02	15547506	G	T	T	T	T	T	T	T	T	T	T	-	G	T	-	-	T		T	-	T	T	T	-	T	T	T	T	T	T	T	T	T
C2_7083	chr02	16012328	A	C	C	C	C	C	C	C	C	C	C	C	C	C	-	-	C		C	C	C	-	C	-	C	C	C	C	C	C	C	C	C
C2_7175	chr02	16505628	A	T	A/T	T	A/T	T	A/T	A/T	T	A/T	A/T	A	A	A/T	A	-	A/T		A	A/T	T	A	A	A	A	T	A	T	T	T	A/T	T	A
C2_7190	chr02	16572094	T	C	C/T	C	C	C	C	C/T	C	C	C/T	T	T	C/T	T	-	C		T	-	C	T	T	-	T	C	T	C	C	C	C	C	T
C2_7191	chr02	16572178	A	G	A/G	G	A/G	G	A/G	G	G	G	A/G	A	A	A/G	A	-	G		A	-	G	A	A	A	A	G	A	G	G	G	G	G	A
C2_7194	chr02	16677725	G	T	G/T	T	G	T	G/T	G/T	T	T	G/T	G	G/T	G/T	G	-	T		G	T	T	G	G	G	G	T	G	T	T	T	T	T	G
C2_7200	chr02	16715629	C	T	C/T	T	C/T	T	C/T	C/T	T	C/T	C/T	C	C/T	C/T	C	-	C/T		C	C	T	C	C	C	C	T	C	T	T	T	T	T	C
C2_7248	chr02	17023191	C	T	C/T	T	C/T	T	C/T	C/T	T	T	C/T	C	C	C/T	C/T	-	T		C	C/T	T	C	C	C	C	T	C	T	T	T	C/T	T	C
C2_7385	chr02	17994472	A	G	A/G	G	A/G	G	A/G	A/G	G	A/G	A/G	A	A	A/G	A	-	G		A	A/G	G	A	A	A	A	G	A	G	G	G	G	G	A
C2_7449	chr02	18522146	C	T	C/T	T	C/T	T	C/T	C/T	T	T	C	C	C/T	C/T	C	-	C/T		C	C	T	C	C	C	C	T	C	T	T	T	T	T	C
C2_7474	chr02	18648773	G	T	G/T	T	G	T	G	G	T	T	G	G	G	G/T	G	-	T		G	T	T	G	G	G	G	T	G	T	T	T	T	T	G
C2_7476	chr02	18648874	T	G	T	T	T	T	T	T	T	T	T	T	T	T	T	-	T		T	T	T	T	T	T	T	T	T	T	T	T	T	T	T
C2_7574	chr02	19310051	G	A	A/G	A	A	A/G	A/G	A/G	A	A	A/G	G	G	A/G	A/G	-	A/G		G	A/G	A	G	G	G	G	A	G	A	A	A	A	A	G
C2_7604	chr02	19524885	A	T	A	A	A	A	A	A	A	A	A	A	A	A	A	-	A		A	A	A	A	A	A	A	A	A	A	A	A	A	A	A
C2_7667	chr02	19794286	G	A	A	A	A	A	A	A	A	A	A	A	A	A	A	-	A		A	A	A	A	A	A	A	A	A	A	A	A	A	A	A
C2_7704	chr02	20186922	A	T	A/T	T	T	A	A	T	T	T	A	T	A	A/T	T	-	T		A	-	A	A	A	A	A	T	A	T	T	T	-	T	A
C2_7716	chr02	20245449	T	C	C/T	-	C	T	C	C	C	C	T	C	T	T	C	-	C		T	-	T	T	T	T	T	C	T	C	C	C	C	C	T
C2_7731	chr02	20378976	A	G	A	A	A	A	A	A	A	A	A	A	A	A	-	-	A		A	-	A	A	A	A	A	A	A	A	A	A	A	A	A
C2_7853	chr02	21090662	T	G	G	G	G	G	G	G	G	G	G	G	G	G	-	-	G		G	-	G	G	G	G	G	G	G	G	G	-	G	-	G
C2_7961	chr02	21819575	G	T	G/T	T	T	G/T	T	T	T	T	T	T	G	G/T	T	-	T		G	T	T	G/T	G	T	G	T	G	G/T	T	T	T	G/T	G
C2_7962	chr02	21825806	C	T	T	T	T	C/T	T	T	T	T	T	T	C	C/T	T	-	T		C	T	T	-	C	T	C	T	C	C/T	T	T	T	C/T	C
C2_8013	chr02	22155575	T	C	C/T	C	C	C/T	C	C	C	C	C	C	C/T	C/T	C	-	C		T	C	C	T	T	C	T	C	T	C/T	C	C	C	C/T	T
C2_8295	chr02	24313523	C	A	C	C	C	C	A/C	C	C	C	C	C	C	C	C	-	C		C	C	A/C	C	C	C	C	C	C	C	A/C	C	C	C	C
C2_8401	chr02	25060883	C	G	C	C	G	G	-	G	G	G	C	G	C	C	G	-	G		C	G	G	C	C	G	C	C	C	C	C	G	G	G	C
C2_8427	chr02	25198511	C	G	C	C	G	C/G	C/G	G	G	G	C/G	G	C/G	C	G	G	G		C	G	G	C	C	G	C	C	C	C	C/G	G	G	G	C
C2_8443	chr02	25331588	G	T	G	G	T	G/T	G/T	T	T	T	T	T	G/T	G	T	-	T		G	T	T	G	G	T	G	G	G	G	T	T	T	T	G
C2_8524	chr02	25766461	C	T	C	C	-	C/T	C	T	T	T	T	C	C	C	-	-	T		C	T	T	C	C	T	C	C	C	C	T	T	T	T	C
C2_8539	chr02	25863875	T	C	T	T	C	C	C/T	C	C	C	C	C/T	C/T	T	C	-	C		T	C	C	T	T	C	T	T	T	T	C	C	C	C	T
C2_8806	chr02	27579445	T	G	T	T	T	T	T	T	T	T	T	T	T	T	-	-	T		T	-	T	T	T	T	T	T	T	T	T	T	T	T	T
C2_8931	chr02	28441088	G	C	G	G	G	G	C	G	G	G	C/G	G	G	G	G	-	G		G	G	G	G	G	G	G	G	G	G	G	G	G	G	G
C2_8934	chr02	28444164	C	A	C	C	C	C	C	C	C	C	C	C	C	C	C	-	C		C	C	C	C	C	C	C	C	C	C	C	C	C	C	C
C2_9080	chr02	29335071	A	G	A	A	A	A	A	A	A	A	A	A	A	A	-	-	-		A	A	A	A	A	A	A	A	A	A	A	A	A	A	A
C2_9155	chr02	29822344	G	A	G	G	G	G	G	G	G	G	G	G	G	G	G	-	G		G	-	G	-	G	G	G	G	G	G	G	G	G	G	G
C2_9204	chr02	30050752	C	G	C	C	C	C	C	C	C	C	C	C	C	C	C	-	C		C	C	C	C	C	C	C	C	C	C	C	C	C	C	C
C2_9233	chr02	30251697	T	G	G	G/T	G	G	G	G/T	G	T	G/T	T	G	G	G	-	G		G	G	G	G	G	G	T	G/T	G	G/T	G/T	G	G	G	G
C2_9658	chr02	32815736	T	A	T	A/T	A/T	T	T	T	A	A/T	A/T	T	A	A	A	-	T		A	A	A/T	T	A	A	A	A	A	T	A	A	A	A	T
C2_9878	chr02	34288275	G	T	T	T	T	T	T	T	T	T	T	T	T	T	T	-	T		T	-	T	T	T	T	T	T	T	T	T	T	T	T	T
C2_9882	chr02	34293784	A	G	A	A	A	A	A	A	A	A	A	A	A	A	-	-	A		-	-	A	A	A	A	A	A	A	A	A	A	A	A	A
C2_10033	chr02	35256655	G	A	G	G	G	G	A/G	A/G	A	A/G	A	G	A	A	A	-	G		A	-	G	A	A/G	G	A	A	A	G	A	A	A	A	G
C2_10127	chr02	35901513	T	G	T	T	T	T	T	T	T	T	T	T	T	T	T	-	T		T	-	T	T	T	T	T	T	T	T	T	T	T	T	T
C3_16050	chr03	795940	G	A	A	A	A	A	A	A	A	A	A	A	A	A	A	-	A		A	-	A	A	A	A	A	A	A	A	A	A	A	A	A
C3_11872	chr03	1444508	C	G	G	C	C	G	G	C/G	C	G	C/G	G	G	G	G	C	C		C	C	G	G	C	G	C/G	C/G	C/G	C/G	G	C/G	G	C	C/G
C3_11873	chr03	1444515	G	T	T	G	G	T	T	G/T	G	T	G/T	T	T	T	T	-	G/T		G	G	T	T	G	T	G/T	G/T	G/T	G/T	T	G/T	T	G	G/T
C3_13170	chr03	2288015	A	C	C	C	C	C	C	C	C	C	C	C	C	C	C	-	C		C	-	C	C	C	-	C	C	C	-	C	C	C	C	-
C3_14158	chr03	2932075	A	T	T	T	T	T	T	T	T	T	T	-	T	T	-	-	T		T	-	T	T	T	T	T	T	T	T	T	T	T	T	T
C3_14827	chr03	3347942	T	G	G	G	G	G	G	G	G	G	G	G	G	G	-	-	G/T		G	-	G	G	G	G	G	G	G	G	G/T	G	G	G	G
C3_15172	chr03	3546365	A	G	A	A	A	A	A	A	A	A	A	A	A	A	A	-	A		A	A	A	A	A	-	A	A	A	A	A	A	A	A	A
C3_16030	chr03	7874018	G	T	T	-	T	T	T	T	T	T	T	T	T	T	T	-	T		-	-	T	T	T	T	T	T	T	T	T	T	T	T	-
C3_16066	chr03	8036497	G	T	T	T	T	T	T	T	T	T	T	-	T	T	T	-	T		T	-	T	T	T	T	T	T	T	T	T	T	T	T	-
C3_16157	chr03	8746978	C	T	T	T	-	T	T	T	T	T	T	T	T	T	T	-	T		T	-	T	T	T	-	T	T	T	T	T	T	T	-	T
C3_16191	chr03	8962917	A	G	G	A	A	A	A	G	G	A	A	G	A	G	G	-	G		A	A	A/G	A	A	A	A/G	G	A/G	A	G	A	G	A	A
C3_11281	chr03	10548673	A	G	A	A	A	A	A	A	A	A	A	A	A	A	A	-	A		A	-	A	A	A	A	A	A	A	-	A	A	A	A	A
C3_11345	chr03	11036214	T	A	T	T	T	T	T	T	T	T	T	T	T	T	-	-	T		T	-	T	T	T	T	T	T	T	T	T	T	T	T	T
C3_11350	chr03	11072310	T	C	T	T	T	T	T	T	T	T	T	T	T	T	T	-	T		T	-	-	T	T	T	T	T	T	T	T	T	T	T	T
C3_11505	chr03	12150090	A	T	T	T	T	T	T	T	T	T	T	T	T	T	-	-	T		T	-	T	T	T	T	T	T	T	T	T	T	T	T	T
C3_11512	chr03	12186678	G	T	T	T	T	T	T	T	T	T	T	T	T	T	T	-	T		T	-	T	T	T	T	T	T	T	T	T	T	T	T	T
C3_11738	chr03	13644480	C	T	T	T	T	T	T	T	T	T	T	T	T	T	T	-	T		T	T	T	T	T	T	T	T	T	T	T	T	T	T	T
C3_11764	chr03	13744841	T	G	G	G	G	G	G	G	G	G	G	G	G	G	G	-	G		G	-	G/T	G	G	G	G	G	G	G	G	G	G	G	G
C3_11770	chr03	13785247	T	G	G	G	G	G	G	G	G	G	G	G	G	G	-	-	G		G	-	G	G	G	G	G	G	G	G	G	G	G	G	G/T
C3_11775	chr03	13813714	T	A	A/T	T	A	T	T	A	A	T	A/T	A	A	A	A	-	A		T	A	T	A/T	A	T	A/T	T	A/T	A/T	A	T	A	T	T
C3_11850	chr03	14320218	G	C	G	G	G	G	G	G	G	G	G	G	G	G	G	-	G		G	-	G	G	G	G	C	G	G	G	G	-	G	C/G	G
C3_11949	chr03	15034019	A	G	G	G	G	A	A	A/G	G	A	A/G	G	G	G	G	-	A/G		A/G	G	A/G	A/G	G	A	A/G	A	G	A/G	G	A	G	G	A
C3_11983	chr03	15250501	A	C	C	C	C	C	C	C	C	C	C	C	C	C	C	-	C		C	-	C	C	C	C	C	C	C	-	C	C	C	C	C
C3_12081	chr03	15897118	T	C	C	C	C	C	C	C	C	C	C	C	C	C	C	-	C		C	-	C	C	C	C	C	C	C	C	C	C	C	C	C
C3_12367	chr03	17610580	A	G	A	A	A	A	A	A/G	G	G	A/G	A/G	A/G	G	G	-	G		A	-	A/G	G	A/G	-	A	G	G	A	A	A	G	A/G	A
C3_12475	chr03	18395101	G	A	-	G	A/G	A	A	G	A/G	G	A	A	A/G	A/G	A	-	A		A/G	-	A	A	G	A	G	G	A/G	G	A	A/G	A	A	G
C3_12518	chr03	18675050	T	C	C	C	C	C	C	C	C	C	C	C	C	C	-	-	C		C	C	C	C	C	-	-	C	C	C	-	C	C	C	C
C3_12743	chr03	20263299	G	C	C	C	C	C	C	C	C	C	C	C	C	C	C	-	C		C	-	C	C	C	C	C	C	C	C	C	C	C	C	C
C3_12995	chr03	22000007	G	T	T	T	-	T	T	T	T	T	T	-	-	T	T	-	T		T	-	T	T	T	T	T	T	T	T	T	T	T	T	T
C3_13030	chr03	22290140	A	C	A	A	-	A	A	A	A	A	A	A	A	A	A	-	A		A	-	A	A	A	A	A	A	A	-	A	A	A	A	A
C3_13210	chr03	23081296	T	A	T	T	-	T	-	T	T	T	T	T	T	T	T	-	T		T	T	T	T	T	T	T	T	T	-	T	T	T	T	T
C3_13336	chr03	24026932	T	C	T	T	T	T	T	T	T	T	T	T	T	T	-	-	T		T	-	T	T	T	T	T	T	T	T	T	T	T	T	T
C3_13339	chr03	24027224	T	G	T	T	T	T	T	T	T	T	T	T	T	T	T	-	T		T	-	T	T	T	T	T	T	T	T	T	T	T	T	T
C3_13435	chr03	24628092	T	C	T	T	T	T	T	T	C/T	C	C	T	C	C	-	-	T		T	-	C/T	T	C	T	C	C/T	C	T	T	T	T	C/T	T
C3_13664	chr03	26170910	G	A	G	G	G	G	G	G	G	G	G	G	G	G	G	-	G		G	-	G	G	G	G	G	G	G	G	G	G	G	G	G
C3_13826	chr03	27313394	C	A	C	C	C	C	C	C	C	C	C	C	C	C	-	-	C		C	-	C	C	C	C	C	C	C	C	C	C	C	C	C
C3_14037	chr03	28569589	G	T	T	T	T	T	T	T	T	T	T	T	T	T	T	-	T		T	-	T	T	T	T	T	T	T	T	T	T	T	T	T
C3_14055	chr03	28664896	C	A	A	A	A	A	A	A	A	A	A	A	A	A	A	-	A		A	-	A	A	A	A	A	A	A	A	A	A	A	A	A
C3_14091	chr03	28914450	G	A	G	G	G	G	G	G	G	G	G	G	G	G	G	-	G		G	-	G	G	G	G	G	G	G	G	G	G	G	G	G
C3_14414	chr03	31066752	C	T	T	T	T	T	T	T	T	T	T	T	-	T	T	-	T		T	T	T	T	T	T	T	T	T	T	T	T	T	T	T
C3_14661	chr03	32403765	C	G	G	G	G	G	G	G	G	G	G	G	G	G	G	-	G		G	-	G	G	C/G	G	G	G	G	G	G	G	G	G	G
C3_14778	chr03	33225225	C	A	A	A	A	A	A	A/C	A	A/C	A	-	A	A	A	-	A		-	-	A	A	A/C	-	A	A	A	A	C	A	A/C	A/C	A
C3_14818	chr03	33438083	G	T	T	T	T	T	T	T	T	T	T	T	T	T	T	-	T		T	-	T	T	T	T	T	T	T	T	T	T	T	T	T
C3_15012	chr03	34511747	G	A	A	A	A	A	A	A	A	A	A	A	A	A	A	-	A		A	A	A	A	A	A	A	A	A	A	A	A	A	A	A
C3_15086	chr03	34943128	A	T	A	A	A	A	A	A	A	A	A	A	A	A	A	-	A		A	-	A	A	A	-	A	A	A	-	A	A	A	A	A
C3_15260	chr03	35978400	T	G	G/T	T	T	T	T	T	T	T	T	T	T	T	T	-	T		T	-	T	G/T	T	G/T	T	T	T	T	T	T	T	T	T
C3_15267	chr03	35999749	C	T	T	T	T	T	-	T	T	T	T	T	T	T	T	-	T		T	-	T	T	-	T	T	T	T	T	T	T	T	T	T
C3_15271	chr03	36030348	G	A	A	A	-	A	G	A	A	A	A	A	A	A	-	-	A		A	-	A	A	A	-	A	A	A	A	G	A	A	A	A
C4_17199	chr04	158129	T	C	C	C	C	C/T	T	T	T	C	C	T	C	C	C/T	-	T		C	-	C/T	T	C	C	T	C	T	C/T	T	C/T	T	C	T
C4_17778	chr04	198873	C	T	T	T	T	C/T	C	C	C	T	T	C	T	T	T	-	C		T	-	C/T	C	T	T	C	C/T	C	C/T	C	C/T	C	T	C
C4_17970	chr04	211696	A	G	A/G	G	G	A/G	A	A	A	G	G	A/G	G	G	A/G	A	A		G	G	A/G	A	G	G	A	A/G	A	A/G	A	A/G	A	A/G	A
C4_18252	chr04	231303	G	A	A/G	A	A	G	G	G	G	A	A	G	A	A	G	-	G		A	-	A/G	G	A	A	G	A	G	A/G	G	A/G	G	A	G
C4_18988	chr04	280837	G	A	A	A	A	A	G	G	G	A	A	A	A	A	A	-	G		A	A	A	A/G	A	A	G	A	G	A	G	A	G	A	G
C4_20564	chr04	741402	A	T	T	T	T	T	T	T	T	T	T	T	T	-	T	-	T		T	T	T	T	T	T	-	T	T	T	T	T	T	T	T
C4_20763	chr04	863547	T	C	C	C	C	C	T	T	T	C	C	T	C	C	-	-	T		C	-	C/T	T	C	C	T	C/T	T	C	T	C	C	C	T
C4_16515	chr04	1103587	C	T	T	T	T	T	C	C	C	T	T	T	T	T	T	-	-		T	T	C	C	T	T	C	T	C	T	C	T	T	T	C
C4_16517	chr04	1103791	C	T	T	T	T	T	C	C	-	T	T	T	T	T	T	-	C		T	T	C	C	T	T	C	T	C	T	C	T	T	T	C
C4_17587	chr04	1873372	G	A	A	A	A	G	G	G	G	A	A/G	G	A	A	A/G	-	G		A	A	A/G	G	A	A	G	A/G	G	A/G	G	A	A/G	A	G
C4_17822	chr04	2020957	G	A	A	A	A	G	G	G	G	A	A/G	A/G	A	A	A/G	-	G		A	-	A/G	G	A	A	G	G	G	A/G	G	A/G	A/G	A	G
C4_17984	chr04	2126999	T	C	C	C	C	T	T	T	T	C	C	T	C	C	-	-	T		C	-	T	T	C	C	T	C	T	C	T	C	C/T	-	T
C4_17992	chr04	2135727	C	A	A	A/C	A	C	C	C	C	A	A	C	A	A	A/C	-	C		A	A	C	C	A	A	C	A	C	C	C	A/C	A	A	C
C4_18300	chr04	2356451	A	C	A	A	A	A	A	A	A	A	A	A	A	A	A	-	A		A	-	A	A	A	A	A	A	A	A	A	A	A	A	A
C4_18505	chr04	2489872	G	A	A	A	A	A/G	G	G	G	A	A	G	A	A	A	-	G		A	A	A/G	G	A	A	G	A/G	G	G	G	A	G	A	G
C4_19280	chr04	3024951	C	A	A	A	A	A	-	C	C	A	A	A/C	A	A	A/C	-	C		A	A	A	A	A	A	C	A	-	A	C	A	A/C	A	C
C4_19826	chr04	3441193	C	T	T	T	T	C	C	C	C	T	C/T	C	T	T	C	-	C		T	T	C/T	C	T	T	C	C/T	C	C/T	C	C/T	C/T	C/T	C
C4_19849	chr04	3447887	T	C	C	C	C	C	T	T	T	C	C	-	C	C	T	-	-		C	-	T	T	C	-	T	C/T	T	T	T	C	T	C	T
C4_19895	chr04	3467771	G	C	C	C	C	C/G	G	G	G	C	C	C	C	C	C/G	-	G		C	C	C	C/G	C	C	G	C	G	C	G	C	C	C	G
C4_20002	chr04	3578145	G	A	A	A	A	G	G	G	G	A	A	A	A	A	G	-	G		A	-	A/G	G	A	A	G	A/G	G	A/G	G	A	A/G	A	G
C4_20003	chr04	3578439	T	C	C	C	C	T	T	T	T	C	C	C/T	C	C	T	-	T		C	C	C/T	T	C	C	T	C/T	T	C/T	T	C/T	C/T	C/T	T
C4_20006	chr04	3640853	A	C	A	A/C	A/C	A	A/C	A/C	C	A	C	C	A	A	A	-	A		A/C	A	A/C	A	A/C	C	A/C	A	C	A/C	A	C	A/C	A	A
C4_20010	chr04	3714036	C	G	G	G	G	G	G	G	G	G	G	G	G	G	G	-	G		G	-	G	G	G	G	G	G	G	G	G	G	G	G	G
C4_20046	chr04	4007136	T	G	G	G	G	G	G	G	G	G	G	G	G	G	G	-	G		G	-	G	G	G	G	G	G	G	G	G	G	G	G	G
C4_20280	chr04	5471962	C	T	T	T	T	T	T	T	T	T	T	T	T	T	T	-	T		T	T	T	T	T	T	T	T	T	T	T	T	T	T	T
C4_20359	chr04	6135746	T	A	A	A	A	T	A	T	T	A	T	A	A/T	A	T	-	T		A	A	A/T	T	A	A	A/T	A/T	T	A	T	A/T	A/T	T	T
C4_20371	chr04	6199238	A	G	G	G	G	A	G	A	A	G	A	G	A/G	G	A	-	A		G	G	A/G	A	G	G	A/G	A/G	A	G	A	A/G	A/G	A	A
C4_20372	chr04	6205209	A	G	G	G	G	A	G	A	A	G	A	G	G	G	A	-	A		G	-	G	A	G	G	G	A/G	A	G	A	A/G	A	A	A
C4_20376	chr04	6228469	C	G	G	G	G	C	G	C	C	G	C	G	C/G	G	C	-	C		G	G	C/G	C	G	G	C/G	C/G	C	G	C	C/G	C	C	C
C4_20377	chr04	6228582	T	A	T	T	T	T	T	T	T	T	T	T	T	T	T	-	T		T	-	T	T	T	T	T	T	T	T	T	T	T	T	T
C4_20525	chr04	7166150	G	T	G	G	G	G	G	G	G	G	G	G	G	G	G	-	G		G	-	G	G	G	G	G	G	G	G	G	G	G	G	G
C4_20583	chr04	7567633	T	C	T	T	T	-	T	T	T	T	T	T	T	T	T	-	T		T	T	T	T	T	T	T	T	T	T	T	T	T	T	T
C4_20684	chr04	8113970	C	T	T	T	T	C	T	C	C	T	C	C/T	C/T	T	C	-	C		T	-	T	C	T	T	C/T	C	C	T	C	C/T	C	C	C
C4_21083	chr04	9507283	T	G	G	G	G	G	G	G	G	G	G	G	G	G	G	-	G		G	T	G	G	G	G	G	G	G	G	G	G	G	G	G
C4_21095	chr04	9593978	A	T	T	T	T	T	T	T	T	T	T	T	T	T	T	-	T		T	-	T	T	T	T	T	T	T	T	T	T	T	T	T
C4_21116	chr04	9672978	C	T	T	T	T	T	T	T	T	T	T	T	T	T	T	-	T		T	T	T	T	T	T	T	T	T	T	T	T	T	T	T
C4_16354	chr04	10224348	T	G	G/T	G	G	G	G	G	G	G	G	G	G	G	G	-	G		G	G	G	G	G	G	G	G	G	G	G/T	G	-	-	G
C4_16472	chr04	10748492	T	G	T	T	T	T	T	T	T	T	T	T	T	T	T	-	T		T	-	T	T	T	T	T	T	T	T	T	T	T	T	T
C4_16602	chr04	11541165	G	T	T	T	G	T	-	T	T	T	T	T	T	T	T	-	T		-	-	T	T	T	T	-	T	T	T	T	T	T	T	T
C4_16777	chr04	12526780	T	G	G	G	-	T	G	G/T	G	G	G	G	G	G	G	-	G		G	G	G	-	G	G	G	G	G	G	G	G	G	G	G
C4_16785	chr04	12553593	G	T	T	T	T	T	T	T	T	T	T	T	T	T	T	-	T		T	T	T	T	T	T	T	T	T	T	T	T	T	T	T
C4_17033	chr04	14270486	T	C	C	C	C	T	C	T	T	C	T	C	C	C	C	-	T		C/T	-	T	C	C	C	C	T	T	C	T	C	T	C/T	T
C4_17058	chr04	14628388	A	G	G	G	G	G	G	G	G	G	G	A/G	G	G	G	-	G		G	A	A/G	G	-	G	G	A/G	G	A/G	G	A/G	A/G	G	G
C4_17104	chr04	14945437	T	A	A/T	A/T	-	A/T	A	A/T	A/T	A	A	A	A/T	A/T	A	-	A		A/T	-	A	A/T	A	A	A/T	A	A/T	A	A	A/T	A/T	A/T	A
C4_17115	chr04	15021122	T	C	C	C	C	T	C	T	T	C	T	C	C	C	C	-	T		C/T	-	T	C	C	C	C	T	T	C	T	C	C/T	C/T	T
C4_17169	chr04	15549572	G	A	A/G	A	A	G	A	G	G	A	G	A	A	A	G	-	G		G	G	G	A	A	A	A	G	G	A	G	G	A/G	G	G
C4_17175	chr04	15590887	A	G	G	G	G	A	G	A	A	G	A	G	A/G	G	A	-	A		-	-	A	G	G	G	A	A	A	G	A	G	A/G	-	A
C4_17191	chr04	15753538	A	G	G	G	G	A	G	A	A	G	A	G	G	G	A	-	A		A	-	A/G	G	G	G	G	A	A	G	A	G	G	G	A
C4_17205	chr04	15895592	G	T	G	T	G	G	G	G/T	G	G	G	G	G	G	G	-	G		G	T	G	-	G	G	-	G	G	G	G	G	G	G	G
C4_17214	chr04	15938632	C	T	C/T	T	C/T	C	T	C	C	T	C	C/T	T	T	C	-	C		C/T	C	C	T	T	T	T	C	C	T	C	C/T	C/T	C/T	C
C4_17215	chr04	15938657	C	T	C/T	T	C	C	T	C	C	T	C	C	T	T	C	-	C		C/T	C	C	T	T	T	T	C	C	T	C	T	C/T	T	C
C4_17276	chr04	16360217	A	T	A/T	T	A	A	T	A	A	A/T	A	A/T	T	T	A	-	A		A/T	A	A	T	T	T	T	A	A	T	A	A/T	A	A	A
C4_17386	chr04	17234660	T	C	C	C	C	-	C	T	T	T	T	T	C	C	C	-	T		-	-	T	C	C	C	C	T	T	C	T	C	T	C	T
C4_17393	chr04	17260416	T	G	G	G	G	T	G	T	T	G	T	T	G/T	G	-	-	T		T	-	T	G	G	G	G	T	T	G	T	G	T	G	T
C4_17413	chr04	17476098	A	G	A/G	G	A	A	G	A	A	A	A	G	G	G	-	-	A		A	A	A	G	G	G	G	A	A	G	A	G	A	G	A
C4_17431	chr04	17688004	G	T	T	T	T	T	T	T	T	T	T	T	T	T	-	-	T		T	-	T	T	T	-	T	T	T	T	T	T	T	T	T
C4_17504	chr04	18195013	A	T	T	T	T	T	T	T	T	T	T	T	T	T	T	-	T		T	-	T	T	T	-	T	T	T	-	T	-	T	T	T
C4_17563	chr04	18583240	T	G	T	T	T	T	T	T	T	T	T	T	T	T	-	-	T		T	T	T	T	T	T	T	T	T	T	T	T	T	T	T
C4_17731	chr04	19636582	A	T	A	T	A	T	T	A	T	T	A/T	T	A/T	A/T	A	-	A/T		A	-	T	A/T	A/T	T	A/T	A	T	A/T	T	A	T	A/T	T
C4_17788	chr04	19928890	A	G	G	G	A	A	A	A	G	A/G	A	G	A	G	A	-	A		A	A	A	G	G	G	G	G	A	G	A	A/G	G	G	A
C4_17790	chr04	19929205	C	T	T	T	C	C	C	C	T	C/T	C	C/T	C	T	C	T	C		C	C	C	T	T	T	C/T	C/T	C	T	C	C/T	T	T	C
C4_17873	chr04	20503035	T	G	G	G	G	G	G	G	G	G	G	G	G	G	G	-	G		G	-	G	G	G	G	G	G	G	G	G	G	G	G	G
C4_18499	chr04	24855868	A	C	C	C	C	C	C	C	C	C	C	C	C	C	C	-	C		C	C	C	C	C	C	C	C	C	C	C	C	C	C	C
C4_18521	chr04	25001535	T	C	T	T	T	T	T	T	T	T	T	T	T	T	-	-	T		T	T	T	T	T	-	-	T	T	T	T	T	T	T	T
C4_18818	chr04	26891328	T	A	T	T	T	T	T	T	T	T	T	T	T	T	-	-	T		-	-	T	T	T	T	T	T	T	T	T	T	T	T	T
C4_18885	chr04	27332074	A	T	T	T	-	A	T	T	T	T	T	T	T	T	T	-	T		T	T	T	T	T	-	T	T	T	T	T	T	T	T	T
C4_18974	chr04	27978716	A	C	A	A/C	C	A	A/C	A	C	A	C	C	A	A	-	-	A/C		A/C	-	A/C	A	A/C	C	A/C	A	A/C	A/C	A	C	A/C	A	A
C4_19005	chr04	28210101	C	A	A/C	A/C	A/C	A/C	A	A/C	A/C	A/C	A	C	A	A	A	-	A/C		A	C	C	C	A	A	A	C	C	A/C	A/C	A	A	A/C	C
C4_19061	chr04	28624831	G	T	T	T	T	T	T	T	T	T	T	T	T	T	T	-	T		T	-	T	T	T	-	T	T	T	T	T	T	T	T	T
C4_19184	chr04	29569561	T	A	-	T	T	T	T	T	T	T	T	T	T	T	T	-	T		T	T	T	T	T	T	T	T	T	T	T	T	T	T	T
C4_19210	chr04	29823605	A	G	G	G	G	G	G	G	G	G	A/G	G	A	G	G	G	G		A	A	A	G	A	G	G	G	G	G	A	A/G	A	A/G	A
C4_19265	chr04	30206469	A	G	G	G	A/G	G	A/G	G	G	G	G	G	G	G	G	-	G		G	-	A/G	G	A/G	-	G	G	G	G	G	G	G	G	A/G
C4_19283	chr04	30271607	T	G	G	G	G	G	G	G	G	G	G	G	G	G	-	-	G		-	-	G	G	T	G	-	G	G	G	G	G	G	G	G
C4_19289	chr04	30344043	G	A	A	A	A	A	A	A	A	A	A	A	A	A	A	-	A		A	A	A	A	A	A	A	A	A	A	A	A	A	A	A
C4_19304	chr04	30511751	G	A	A	A	A	A	A	A	A	A	A/G	A	A/G	A	A	-	A		G	-	G	A	G	A	G	A	A	A	G	A/G	G	A/G	G
C4_19390	chr04	31264195	T	C	C	C	C	C	C	C	C	C	C/T	C	C/T	C	C	-	C		T	-	T	C	T	T	T	C	C	C	T	C/T	T	C/T	T
C4_19439	chr04	31628072	C	A	C	C	C	C	C	C	C	C	C	A	C	C	C	-	C		C	C	A/C	C	A/C	C	C	C	C	C	C	C	C	C	C
C4_19500	chr04	31909756	C	T	T	T	-	T	T	T	T	T	T	T	T	T	T	-	T		T	-	T	T	T	T	T	T	T	T	T	T	T	T	T
C4_19586	chr04	32438249	T	A	A	A	A	A	A	A	A	A	A/T	A	A/T	A	A	-	A		T	A	A/T	A	A/T	A/T	T	A	A	A	T	A/T	T	A/T	T
C4_19641	chr04	32754778	C	T	T	T	T	T	T	T	T	T	T	T	T	T	T	-	T		T	-	T	T	T	T	T	T	T	T	T	T	T	T	T
C4_19747	chr04	33637009	A	T	-	T	T	T	T	T	T	T	T	T	T	T	T	-	T		T	T	T	T	T	T	T	T	T	T	T	T	T	T	T
C4_19954	chr04	35083800	A	C	C	C	-	C	C	C	C	C	C	C	C	C	C	-	C		C	-	C	C	C	C	C	C	C	C	C	C	C	C	C
C5_21376	chr05	115110	T	G	T	T	T	T	-	T	T	T	T	T	T	T	T	-	T		T	-	T	-	T	-	T	T	T	T	T	T	T	T	T
C5_25116	chr05	940857	G	T	T	T	T	T	T	T	T	T	T	T	T	T	T	-	T		T	-	T	T	T	T	T	T	T	T	T	T	T	T	T
C5_25117	chr05	941047	T	G	T	T	T	T	T	T	T	T	T	T	T	T	T	-	T		T	-	T	T	T	T	T	T	T	T	T	T	T	T	T
C5_24001	chr05	2955252	T	A	-	T	T	T	T	T	T	T	T	T	T	T	-	-	T		T	-	T	T	T	T	T	T	T	T	T	T	T	T	T
C5_24258	chr05	4263506	A	T	T	T	T	T	-	T	T	T	T	T	T	T	-	-	T		T	T	T	T	T	T	T	T	T	T	T	T	T	T	T
C5_24307	chr05	4517843	G	A	G	G	G	G	G	G	G	G	G	G	G	G	-	-	G		G	-	G	G	G	G	G	G	G	G	G	G	G	G	G
C5_24470	chr05	5514677	T	G	T	T	T	-	T	T	T	T	T	T	T	T	T	-	T		T	T	T	T	T	T	T	T	T	T	T	T	T	T	T
C5_24681	chr05	6780401	A	T	T	A	T	A	A	A	T	A	A/T	T	A/T	T	A/T	-	A		T	T	A	T	A	A	A	A	A	A	T	T	A	T	A
C5_24689	chr05	6867009	C	T	T	C	T	C	C	C/T	T	C	C	T	C/T	T	C	-	C		T	T	C	T	C	C	C	C	C	C	T	T	C	C/T	C
C5_24698	chr05	6899935	A	G	G	A	G	A	A	A	G	A	A/G	G	A/G	G	A/G	-	A		G	G	A	G	A	A	A	A	A	A	G	G	A	A/G	A
C5_24919	chr05	8155896	C	G	G	G	G	G	G	G	G	G	G	G	G	G	-	-	G		G	-	G	-	G	G	G	G	G	G	G	G	G	G	G
C5_24920	chr05	8161431	A	T	A	A	A	A	T	A	A/T	A	A	T	A/T	A	A	-	A		A	T	T	A	T	T	T	A	A/T	A	T	A	T	A	A
C5_25046	chr05	8953447	C	T	T	T	T	T	T	T	T	T	T	T	T	T	-	-	T		T	-	T	T	T	T	T	T	T	T	T	T	T	T	T
C5_25118	chr05	9417056	G	T	G	G	G	T	G	G	G	G	G/T	G	G	G	G	-	G		G	-	G	G/T	G/T	G	G	G	G	G/T	G	G/T	G	G	G
C5_21447	chr05	11886851	A	G	A	A	A	A	A	A	A	A/G	A/G	A	A	A	A	-	A		A/G	-	A	A	A	A	A	A	A	A	G	G	A	A/G	A
C5_21455	chr05	11960362	G	A	A/G	G	A	-	A	A	A	A	A	A	A	A	-	-	A		A	-	A	A	A	A	A	A/G	A	A	A	G	A	A	A
C5_21694	chr05	13589974	T	C	T	T	T	C	C/T	C/T	C	C	T	T	C/T	C	C/T	-	T		C	C	T	C	C/T	T	T	C/T	C/T	T	C	C	T	C/T	C/T
C5_21695	chr05	13590071	A	G	A	A	A	G	A/G	A	G	G	A	A/G	A/G	G	A	-	A		G	G	A	G	A/G	A	A	A	A/G	A	G	G	A	A/G	A/G
C5_21696	chr05	13596493	T	C	T	T	T	C	C	T	C	C	C/T	C	C/T	C	C	-	T		C	C	T	C	C/T	T	T	C/T	C/T	T	C	C	T	C/T	C
C5_21729	chr05	13844725	G	T	T	T	T	T	T	T	T	T	T	T	T	T	T	-	T		T	-	T	T	T	T	T	T	T	T	T	T	T	T	T
C5_21752	chr05	13999694	A	G	G	G	G	A	A	A	A	A	A	G	G	G	G	-	A		G	-	-	A	G	A	G	G	A	G	G	A	G	A	G
C5_21929	chr05	15079990	G	T	T	T	T	T	T	T	T	T	T	T	T	T	T	-	T		T	-	T	T	T	T	T	T	T	T	T	T	T	T	T
C5_22000	chr05	15593795	T	C	T	T	T	T	T	T	T	T	T	T	T	T	T	-	T		T	-	T	T	T	T	T	T	T	T	T	T	T	T	T
C5_22256	chr05	17509857	G	T	G	G	-	G	G	G	G	G	G	G	G	G	G	-	G		G	G	G	G	G	G	G	G	G	G	G	G	G	G	G
C5_22406	chr05	18418420	T	G	T	T	T	T	T	T	T	T	T	T	T	T	-	-	T		T	-	T	T	T	-	T	T	T	T	T	T	T	-	T
C5_22439	chr05	18694459	T	A	T	T	T	T	T	T	T	T	T	T	T	T	T	-	T		T	-	T	T	T	T	T	T	-	T	T	T	T	T	T
C5_22714	chr05	20627515	A	T	A/T	A	A	A/T	A/T	T	A	T	A/T	T	T	A/T	A	T	T		T	A	A	T	A	T	A	A/T	T	A	T	T	T	T	T
C5_22806	chr05	21300090	G	A	G	G	G	A/G	G	G	G	G	G	G	G	A/G	G	-	G		G	G	G	G	G	G	G	G	A/G	G	G	G	G	G	G
C5_22835	chr05	21540455	T	G	T	T	-	T	T	T	T	T	T	T	T	T	T	-	T		T	-	T	-	T	T	T	-	T	T	T	T	T	T	T
C5_22969	chr05	22543430	A	C	C	C	C	C	C	C	A	C	-	C	C	C	-	-	C		-	A	A	C	C	C	C	C	C	C	C	-	A	C	C
C5_23500	chr05	26346971	G	T	G	G	G	T	G	G	G	G	G	G	G	G	G	-	G		G	-	G/T	G	G	T	G	-	G	G	T	-	G	G	G
C5_23519	chr05	26477969	A	G	A	A	A	A	A	A	A	A	A	A	A	A	A	-	A		A	-	A	A	A	A	A	A	A	A	A	A	A	A	A
C5_23706	chr05	27800209	G	A	G	G	G	G	G	G	G	G	G	G	G	G	G	-	G		G	-	G	G	G	G	G	G	G	A	G	G	G	G	G
C5_23883	chr05	28853031	T	G	G	G	G	G	G	G	G	G	G	G	G	G	G	-	G		G	G	G	G	G	G	G	G	G	G	G	G	G	G	G
C5_24043	chr05	29799089	T	C	C	C/T	T	T	C	C	C/T	C	C/T	C	C	T	T	-	C		T	T	C	C	C	C	C	T	T	C	T	T	C/T	C	C
C6_25569	chr06	125641	T	C	C	C	C	C	-	C	C	C	C	C	C	-	C	-	C		C	-	C	C	C	C	-	C	C	C	C	C	C	C	C
C6_26347	chr06	180560	G	C	G	C/G	G	C/G	C	C/G	G	G	G	C/G	C/G	C/G	G	-	C/G		G	-	G	C/G	C/G	G	C/G	G	G	C/G	G	G	C/G	G	G
C6_29113	chr06	840620	T	C	T	C	C	T	C	T	C	C	C	T	C	C	C	-	C/T		C	C	T	T	C	T	T	T	T	C/T	T	C	C	T	C
C6_29165	chr06	873085	A	T	A	T	T	A/T	T	A/T	T	T	T	A	T	T	T	-	A		T	T	A	A	T	A	A	A	A	A	T	T	A/T	A	T
C6_26196	chr06	1711553	G	T	T	T	T	T	T	T	T	-	T	T	T	T	-	-	T		T	-	T	T	T	T	T	T	T	T	T	T	T	T	T
C6_28030	chr06	2953250	T	A	A	A	A	A	A	A	A	A	A	A	A	A	-	-	A		A	A	A	A	A	A	A	A	A	A	A	A	A	A	A
C6_28379	chr06	3670903	A	G	G	G	G	A/G	G	A/G	A/G	G	A/G	A	A	G	G	-	A/G		G	G	A	A	G	A/G	A	A	A	A/G	G	A/G	G	A	A
C6_28465	chr06	4227337	T	C	C	C	C	C	C	C	T	C	C/T	T	T	C	C	C	C/T		C	C	C	T	C	C/T	T	C	T	C	C	C/T	C	T	T
C6_28474	chr06	4314346	G	A	A	A	A	A	A	A/G	G	A	A/G	G	G	A	A	A	A/G		A	A	A	G	A	A/G	G	A	G	A	A	A/G	A	G	G
C6_28491	chr06	4455794	G	A	A	A	A	A	A	A/G	G	A	A/G	G	G	A	A	A	A/G		A	A	A	G	A	A/G	G	A	G	A	A	A/G	A	G	G
C6_28497	chr06	4483146	G	A	A	A	A	A	A	A	G	A	A	G	G	A	A	-	G		A	A	A	A/G	A	A/G	G	A	G	A	A	A/G	A	G	G
C6_28507	chr06	4502668	G	A	A	A	A	A	A	A	G	A	A	G	G	A	A	-	A/G		A	A	A	G	A	A/G	G	A	G	A	A	A/G	A	G	G
C6_28613	chr06	5162936	A	G	G	G	G	G	G	A/G	A	G	A	A	A	G	G	-	A		G	G	G	A	G	A/G	A	G	A	G	G	A	G	A	A
C6_28778	chr06	6274030	A	T	T	T	T	T	A	T	-	T	T	T	T	-	T	-	T		T	-	A	T	T	-	T	T	A	T	T	T	T	T	T
C6_28976	chr06	7602002	C	G	G	G	G	G	C	G	G	G	G	G	G	G	G	-	G		G	-	G	G	G	-	G	G	G	G	G	C	G	-	C
C6_29000	chr06	7751273	C	T	T	T	-	T	T	T	T	T	T	T	T	T	T	-	T		T	T	T	T	T	-	T	T	T	T	T	T	T	T	T
C6_29026	chr06	7848234	G	A	A	A	A	A	A	G	G	A	A/G	G	G	A	A	A	G		A	A	A	G	A	A	G	A	G	A	A	G	A	A/G	G
C6_29065	chr06	8117621	A	G	G	G	G	G	G	A	A	G	A/G	A	A	G	G	-	A		G	G	G	A	G	G	A	G	A/G	A/G	G	A	G	A/G	A
C6_29068	chr06	8139467	C	T	T	-	T	T	T	C	C	T	C	C	C	T	-	-	C		T	T	T	C	T	T	C	T	T	T	T	C	T	C/T	C
C6_29100	chr06	8337632	G	A	A	A	-	A	A	G	G	A	A/G	G	G	A	A	-	G		A	-	A	G	A	A	G	A	A/G	A/G	A	G	A	A/G	G
C6_29170	chr06	8746766	T	G	G	G	-	G	G	G	G	G	G	T	G	T	-	-	T		G	G	G	G	G	G	G	G	G	G	G	G	G	G/T	G
C6_29180	chr06	8832832	A	G	G	G	G	G	G	A	A	G	A/G	A	A	G	G	-	A		G	G	G	A	G	G	A	G	G	A/G	G	A	G	A/G	A
C6_29197	chr06	8978916	C	A	A	A	A	A	A	C	C	A	A/C	C	C	A	A	A	C		A	A	A	C	A	A	C	A	A/C	A/C	A	C	A	A/C	C
C6_29245	chr06	9357477	A	T	T	T	T	T	T	A	T	T	A/T	A	A/T	T	T	-	A		T	T	T	A	T	T	A	T	A/T	A/T	T	A	T	A/T	A
C6_29263	chr06	9531051	C	T	T	T	T	T	T	C	T	T	C/T	C	C/T	T	T	C	C		T	T	T	C	T	T	C	T	C/T	C/T	T	C	T	C/T	C
C6_29272	chr06	9632023	G	T	T	T	T	T	T	G	-	T	G	G	G	T	T	-	G		T	T	T	G	T	-	G	T	T	-	T	G	T	G	G
C6_29285	chr06	9676898	A	G	G	G	G	G	-	A	G	G	A/G	A	A/G	G	G	-	A		G	G	G	A	G	G	A	G	A/G	G	G	A	G	A/G	A
C6_29323	chr06	9870323	C	T	T	T	-	T	T	C/T	T	T	T	C/T	C/T	T	T	-	C/T		T	-	T	C/T	T	T	C/T	T	T	T	T	C/T	T	T	C/T
C6_25217	chr06	10026760	C	G	G	G	G	G	G	C	G	G	C/G	C	C/G	G	G	-	C/G		G	G	G	C/G	G	G	C	G	C/G	C/G	G	C	G	C/G	C
C6_25264	chr06	10419522	A	C	C	C	C	C	C	C	C	C	C	C	C	C	C	-	C		C	C	C	C	C	C	C	C	C	C	C	C	C	C	C
C6_25269	chr06	10435007	A	G	G	G	G	G	G	A	G	G	A/G	A	A/G	G	G	G	A/G		G	G	G	A	G	G	A	G	A/G	G	G	A	G	A/G	A
C6_25290	chr06	10663173	A	C	C	A	A	A	A	A	A	A	A	A	A	A	A	-	A		A	A	A	A	A	A	A	A	A	A	A	A	A	A	A
C6_25327	chr06	10945615	G	T	G	G	G	G/T	G	G	G	G	G	G	G	G	-	-	G		G	-	G	G	G	G	G	G	G	G	G	G/T	G	G	G
C6_25408	chr06	11485124	T	G	G	G	G	G	G	T	G	G	T	T	G/T	G	G	-	T		G	-	G	T	G	G	T	G	G/T	G	G	T	G	G/T	T
C6_25653	chr06	13099400	A	G	G	G	G	G	G	G	G	G	A/G	A	A/G	G	G	G	G		G	G	G	A	G	G	A	G	A/G	A	G	A	G	A/G	A
C6_25884	chr06	14842864	G	A	A	A	A	A	A	A	-	A	-	-	A	A	A	-	A		-	A	A	A	A	A	A	A	A	A	A	A	A	A	A
C6_25908	chr06	15040431	A	G	G	G	G	G	G	G	G	G	A/G	A	A/G	G	-	-	G		G	-	G	A	G	G	A	G	G	A	G	A	G	A/G	A
C6_25957	chr06	15396952	A	C	C	C	C	C	C	C	C	C	C	C	C	C	C	-	C		C	-	C	C	C	C	C	C	C	C	C	C	C	C	C
C6_26015	chr06	15833018	A	T	T	T	T	T	T	T	T	T	T	T	T	T	T	-	T		T	T	T	-	T	T	T	T	T	T	T	T	T	T	T
C6_26020	chr06	15838900	G	A	A	-	A	A	A	A	A	A	A	G	A	A	A	-	A		A	-	A	A	-	A	A	A	A	A	A	-	A	A	A
C6_26518	chr06	19695325	G	A	A	A	A	A	A	A	A	A/G	A	G	A	A	A	-	A		A	A	A	A/G	A	A	G	A	A/G	G	A	G	A	A/G	G
C6_26664	chr06	20544433	C	T	C	T	T	C/T	T	T	T	C	T	C	T	T	T	-	T		T	T	C/T	C	T	T	C	T	C/T	C	T	C	T	C	C
C6_26749	chr06	21129572	T	G	T	T	T	T	T	T	-	T	T	T	T	T	-	-	T		T	-	T	T	T	T	T	T	T	T	T	T	T	T	T
C6_26872	chr06	22023835	C	T	C	C	C	C	C	C	C	C	C	C	C	C	C	-	C		C	-	C	C	C	C	C	C	C	-	C	C	C	C	C
C6_26875	chr06	22046983	G	T	G	G/T	G	G	G	G	G	G	G	G	G	T	G	-	T		G	-	G	G	G	-	G	G	G	G	G	G	G	G	T
C6_26891	chr06	22224497	G	C	G	G	G	G	-	G	G	G	G	C	G	G	-	-	G		-	G	G	G	G	G	G	G	G	G	G	G	G	C	G
C6_26992	chr06	23247939	C	T	T	C	T	T	C	T	T	C/T	C/T	T	C	T	C	C	T		C/T	C/T	T	T	T	C	C	C	T	C/T	C	C	C	T	T
C6_26994	chr06	23272491	C	T	T	C	T	T	C	T	T	C/T	C/T	T	C	T	C	T	T		C/T	C/T	T	T	T	C	C	C	T	C/T	C	C	C	T	T
C6_27141	chr06	23948649	C	T	C/T	C/T	T	T	T	C	T	C/T	C	T	C	T	T	-	C		C/T	T	C/T	C	C	T	C	T	C	C	C	C	T	C	C/T
C6_27238	chr06	24515347	T	A	A	A	A	A	A	T	A	A/T	A	A	T	A	A	-	T		A/T	A	A/T	T	T	T	T	A	T	T	T	T	A	T	A/T
C6_27270	chr06	24574372	G	A	A/G	A/G	A	A	A	G	A	A/G	A/G	A	G	A	A	A	G		A/G	A	A/G	G	G	A/G	G	A	G	G	G	G	A	G	A/G
C6_27295	chr06	24675362	G	T	G/T	T	T	-	T	G	T	G/T	G/T	T	G	T	-	-	G		-	-	T	G	G	T	G	T	G	G	G	G	T	G	T
C6_27338	chr06	24978329	T	G	T	G	G	G	G	T	G	G/T	G/T	G	T	G	G	-	T		G/T	-	T	T	T	T	T	G	T	T	T	T	G	T	G/T
C6_27340	chr06	24985031	C	T	C	C/T	T	T	T	C	T	C/T	C/T	T	C	T	T	-	C		C	-	C	C	C	C	C	T	C	C	C	C	T	C	C
C6_27365	chr06	25230125	C	A	C	A/C	A	A	A	C	A	A/C	A/C	A	C	A	A	-	C		C	A	C	C	C	C	C	A	C	C	C	C	A	C	A/C
C6_27415	chr06	25515786	G	A	G	A/G	A	A	A	G	A	A/G	A/G	A	G	A	A	A	G		G	A	G	G	G	G	G	A	G	G	G	G	A	G	A/G
C6_27594	chr06	26784773	G	A	G	G	A	A	A	G	G	G	A/G	G	G	A/G	A	G	G		A/G	A	G	G	G	A	G	A	G	G	G	G	A	G	A/G
C6_27691	chr06	27441452	C	T	C	C	C	C	C	C	C	C	C	C	C	C	-	-	C		C	C	C	-	C	-	C	C	C	C	C	C	C	C	C
C6_27896	chr06	28592124	G	A	G	G	G	G	G	G	G	G	G	G	G	G	G	-	G		G	-	G	G	G	G	G	G	G	G	G	G	G	G	G
C6_27970	chr06	29158224	C	T	C	C	C	C	C	C	C	C	C	C	C	C	C	-	C		C	-	C	C	C	C	C	C	C	C	C	C	C	C	C
C6_27987	chr06	29295257	T	G	G	G	G	G	-	G	G	G	G	-	G	G	G	-	G		G	G	G	G	G	G	G	G	G	G	G	G	G	G	G
C7_32817	chr07	592386	T	G	T	T	T	T	T	T	T	T	T	T	T	T	-	-	T		T	-	T	T	T	T	T	T	T	T	T	T	T	T	T
C7_33242	chr07	853789	T	G	-	G	G	G	G	G	G	G	G	G	G	G	-	-	G		G	-	G	G	G	G	G	G	G	G	G	G	G	G	G
C7_29511	chr07	1107434	G	T	G	G	T	T	G	G	T	T	G/T	G/T	G	G	G/T	-	G		T	G	T	T	T	G	T	T	T	T	G	T	T	G	T
C7_29525	chr07	1114713	G	A	G	G	G	G	G	G	G	G	G	G	G	G	-	-	G		G	G	G	G	G	G	G	G	G	G	G	G	G	G	G
C7_30022	chr07	1423203	A	C	C	C	C	C	C	C	C	C	C	C	C	C	C	-	C		-	C	C	-	C	-	C	C	C	C	-	C	C	C	C
C7_30689	chr07	1820394	G	T	T	T	T	T	T	T	T	T	T	T	T	T	-	-	T		T	T	T	T	T	T	T	T	T	T	T	T	T	T	T
C7_32039	chr07	2725244	G	A	G	A	A	A	G	G	A	A	A	A	G	G	A	-	G		A	-	A	A	A	G	A	A	G	A	G	A	G	G	A
C7_32748	chr07	5402203	T	G	G	G	-	G	G	G	G	G	G	G	G	T	-	-	G		G	-	G	G	G/T	G	G	G	G	G	G	G/T	G	-	G
C7_32789	chr07	5704087	G	T	T	T	-	T	T	T	T	T	T	T	T	T	T	-	T		T	-	T	T	T	T	T	T	T	T	T	T	T	T	T
C7_33249	chr07	8567221	A	T	T	T	T	A/T	A	A	T	A/T	A/T	A	A	T	A	-	A		A	-	T	A	A	T	T	T	A	A	A/T	T	A	A	T
C7_33328	chr07	9049886	T	C	T	T	-	T	T	-	-	T	T	T	T	T	T	-	T		T	-	T	T	T	T	T	T	T	T	T	T	T	T	T
C7_33344	chr07	9148610	T	G	G	G	G	G	G	G	G	G	G	G	G	G	G	-	G		G	-	G	G	G	T	G	G/T	G	G	G	G	G	G	G
C7_29652	chr07	11926808	C	T	T	T	T	T	T	T	T	-	-	T	T	T	T	-	T		T	-	T	T	T	T	T	T	T	T	T	-	T	T	T
C7_29740	chr07	12604439	G	A	G	G	G	G	G	G	G	G	G	G	G	G	G	-	G		G	G	G	G	G	G	G	G	G	G	G	G	G	G	G
C7_29829	chr07	13101558	G	T	T	T	T	T	T	T	T	T	T	T	T	T	T	-	T		T	-	T	T	T	T	T	T	T	T	-	T	T	T	T
C7_30058	chr07	14288076	G	A	G	G	G	G	G	G	G	G	G	G	G	G	G	-	-		G	G	G	G	G	G	G	G	G	G	G	G	G	G	G
C7_30289	chr07	15780726	G	A	A	A	A	A/G	A/G	A/G	A	A/G	G	G	G	A	A/G	-	A		G	G	A/G	G	G	A	A	A	G	G	A/G	A/G	G	G	A
C7_30293	chr07	15818162	A	G	G	G	G	G	G	A/G	G	A/G	A/G	A/G	A/G	G	G	-	G		A/G	G	A/G	A/G	A/G	G	G	G	A/G	A/G	G	G	A/G	A/G	G
C7_30296	chr07	15826554	G	T	T	T	T	T	T	T	T	T	T	T	T	T	T	-	T		T	T	T	T	T	T	T	T	T	T	T	T	T	T	T
C7_30353	chr07	16122146	C	A	A	A	A	A	A/C	A	A	A/C	C	C	C	A	A	-	A		C	C	A/C	C	C	A	A	A	C	C	A/C	A/C	C	C	A/C
C7_30567	chr07	17475316	A	C	A	A	A	A	A	A	A	A	A	A	A	A	A	-	A		A	A	A	A	A	A	A	A	A	A	A	A	A	A	A
C7_30702	chr07	18261102	G	C	C	C	C	C	C	C	C	C	C	C	C	C	C	-	C		C	-	C	C	C	C	C	C	C	C	C	C	-	C	C
C7_30832	chr07	19137169	A	G	A	A	A	A	A	A	A	A	A	A	A	A	-	-	A		A	-	A	A	A	A	A	A	A	A	A	A	A	A	A
C7_30901	chr07	19487331	C	T	C/T	C	T	T	T	C/T	C	C/T	C	C	C	T	C	-	T		C	-	C/T	T	C	T	T	T	C	C	C/T	C	C	-	T
C7_30953	chr07	19820433	T	C	C/T	C/T	T	T	C/T	C/T	T	C/T	C/T	T	T	T	T	-	C/T		C/T	-	C/T	C	C/T	T	C	T	T	T	C/T	T	T	T	T
C7_31036	chr07	20347477	T	A	T	T	T	T	T	T	T	T	T	T	T	T	T	-	T		T	-	T	T	T	T	T	T	T	T	T	T	T	T	T
C7_31196	chr07	21487640	A	G	-	A	A	A	-	A	A	A	G	A	A	A	A	-	A		A	-	A	A	A	A	-	A	A	A	A	G	A	A	A
C7_31207	chr07	21512424	G	T	G	G	G	G	G	G/T	G	G/T	G	G	G	G	-	-	G		G	-	G	G	G	G	G	G	G	G	G	G	G	G	G
C7_31244	chr07	21784251	G	A	A	A	A	A	G	A	A	A	A	A	A	A	-	-	A		A	-	A	A	A	A	A	A	A	-	A	A	A	A	A
C7_31309	chr07	22196334	A	G	G	A	G	G	A	A/G	A	A	A	G	A	A	A	-	G		G	-	A	G	A	G	G	G	A	A	G	A	A	G	A
C7_31333	chr07	22401386	C	T	T	C	T	C/T	C	C/T	C	C	C/T	T	C	C	C	-	C/T		T	C	C	C/T	C	T	T	T	C	C	C/T	C	C	T	C
C7_31439	chr07	23400632	A	T	T	T	T	T	T	T	T	T	T	T	T	T	T	-	T		T	-	T	T	T	T	T	T	T	T	T	T	T	T	T
C7_31452	chr07	23444479	A	G	G	G	-	G	G	G	-	G	G	G	G	G	-	-	G		G	-	G	G	G	G	G	G	G	G	G	G	G	G	G
C7_31504	chr07	23802978	A	T	T	A	T	A/T	A	A/T	A	A	A/T	T	A	A	A	-	A/T		T	A	A	A/T	A	T	T	T	A	A	T	A	A	T	A
C7_31565	chr07	24270177	T	G	G	G	G	G	G	G	G	G	G	G	G	G	G	-	G		G	-	G	G	G	G	G	G	G	G	G	G	G	G	G
C7_31638	chr07	24826919	T	G	G	G	G	G	G	G	G	G	G	G	G	G	G	-	G		G	G	G	G	G	G	G	G	G	G	G	G	G	G	G
C7_31649	chr07	24909414	G	C	C	C	C	C	C	C	C	C	C	C	C	-	-	-	C		C	C	C	C	C	C	C	C	C	C	C	C	C	C	-
C7_31845	chr07	26143870	G	T	T	T	T	G/T	G	T	T	G/T	G/T	T	G	G/T	T	-	T		G	G/T	T	T	G	G	G	G	G/T	G/T	G/T	G	G	T	G
C7_31860	chr07	26207065	G	T	T	T	T	T	T	T	T	T	T	T	T	T	T	-	T		T	-	T	T	T	T	T	T	T	T	T	T	T	T	T
C7_32065	chr07	27443990	G	T	G	G	G	G	G	G	G	G	G	G	G	G	-	-	G		G	-	G/T	G	G	G	G	G	G	G	G	G	G	G	G
C7_32161	chr07	27959403	C	G	G	G	G	G	G	G	G	G	G	G	G	G	-	-	G		G	G	G	G	G	G	G	G	G	G	G	G	G	G	G
C8_34076	chr08	1339830	T	G	T	T	T	T	T	T	T	T	T	T	T	T	T	-	T		T	T	T	T	T	-	T	T	T	T	-	T	T	T	T
C8_34667	chr08	1700170	C	T	T	T	C/T	T	T	T	T	T	T	T	T	T	-	-	T		T	-	T	T	T	T	T	T	T	T	T	T	T	T	T
C8_34954	chr08	1874184	G	T	T	G/T	T	T	T	T	T	T	T	T	-	T	T	-	T		T	T	T	T	T	T	T	-	T	T	T	T	T	T	T
C8_36800	chr08	5399871	C	T	C	T	C	C/T	C	C/T	C	C/T	T	C	C/T	C	C	-	C/T		C	T	C/T	C	C	T	C	T	C/T	T	C/T	T	T	C	C
C8_36803	chr08	5428911	C	G	C	G	C	C	C	C/G	C	G	C/G	C	C	C	C	-	C		C	-	C/G	C	C	G	C	G	G	G	C/G	G	G	C	C
C8_36919	chr08	6103450	G	T	G	G	-	G	G	G	G	G	G	G	G	G	G	-	T		G	G	G	T	G	G/T	G	G	G	G	G	G	G	G	G
C8_36955	chr08	6359763	T	C	T	T	T	T	T	T	T	T	T	T	T	T	T	-	T		T	-	T	T	T	T	T	T	T	-	T	T	T	T	T
C8_36960	chr08	6387736	G	A	G	A	G	A	G	A	G	A/G	A	A/G	A/G	G	G	-	G		G	-	A	G	G	A	G	A	A/G	A	G	A	A	G	G
C8_37086	chr08	7083088	C	T	T	T	T	T	T	T	T	T	T	T	T	T	-	-	T		T	-	T	T	T	T	T	T	T	T	T	T	T	T	T
C8_37177	chr08	7637928	T	G	G	G	T	G	G	G/T	G	G	G	G	G	G/T	-	-	G		G	-	G	G	G	G	G	G	G	G	G	G	G	G	G
C8_37223	chr08	7942246	A	C	C	C	C	C	C	C	C	C	C	C	C	C	C	-	C		C	-	C	C	C	C	C	C	C	C	C	C	C	C	C
C8_37371	chr08	9032780	T	G	T	T	-	T	T	T	T	T	T	T	T	T	T	-	T		T	-	T	T	T	T	T	T	T	T	T	T	T	T	T
C8_37384	chr08	9154249	T	G	T	T	T	T	T	T	T	T	T	T	T	T	T	-	T		T	-	T	T	T	T	T	T	T	T	T	T	T	T	T
C8_37419	chr08	9254821	C	G	G	G	G	G	G	G	G	G	G	-	G	G	-	-	G		G	-	C	C	G	C	G	G	G	G	G	G	G	G	G
C8_33585	chr08	10485537	A	T	T	A	A	A	T	A	A/T	A	A/T	T	A/T	A	A	-	A		A	-	T	A	T	-	T	T	T	A	T	A	T	A	A
C8_33680	chr08	10924704	G	A	G	G	A/G	A	G	A	A	A/G	A/G	A/G	A/G	G	G	-	A		A/G	A	A/G	G	G	G	A	A	A	A	G	A	A	G	G
C8_33683	chr08	10953149	T	C	T	T	T	T	T	T	T	T	T	T	T	T	T	-	T		T	-	T	T	T	T	T	T	T	T	T	T	T	T	T
C8_33695	chr08	10986918	G	C	G	G	G	C	G	C	C/G	G	C	G	G	G	G	-	C		-	-	G	G	G	G	C	C	C	C	G	C	C	G	G
C8_33840	chr08	11918855	G	A	A/G	G	A/G	A	A	G	A	A	A/G	A	A/G	A/G	G	-	G		G	-	A/G	A	G	-	A/G	G	A	G	A/G	A/G	A/G	A/G	A
C8_33876	chr08	12105108	A	T	T	T	T	T	T	T	T	T	T	T	T	-	T	-	T		T	-	-	T	T	T	T	T	T	T	T	T	T	T	-
C8_34071	chr08	13378157	C	G	G	G	-	G	G	G	G	G	G	G	G	G	-	-	G		G	-	G	G	G	G	G	G	G	G	G	G	G	G	G
C8_34099	chr08	13547284	C	A	A	A	A	A	A	A	A	A	A	A	A	A	A	-	A		A	-	A	A	A	A	A	A	A	A	A	A	A	A	A
C8_34275	chr08	14451678	G	T	T	T	T	T	T	T	T	T	T	T	T	T	-	-	T		T	-	T	T	T	T	T	T	T	T	T	T	T	T	T
C8_34357	chr08	15108059	C	A	A	A	A	A	A	A	A	A	A	A	A	A	-	-	A		A	-	A	A	A	A	A	A	A	A	A	A	A	A	A
C8_34626	chr08	16667405	C	A	C	C	C	A	C	A	A/C	A/C	A	A/C	C	C	C	-	A		A/C	A	-	C	C	C	A	C	A/C	A	A	A	A	C	C
C8_34883	chr08	18339997	A	G	G	G	-	A	A	A	A	A	A	G	G	G	G	-	G		G	-	G	A	G	A	G	G	A	G	G	A	G	A	A
C8_34905	chr08	18411288	T	A	T	T	T	T	T	T	T	T	T	T	T	T	T	-	T		T	-	T	T	T	T	T	T	T	T	T	T	T	T	T
C8_35041	chr08	19275528	A	T	A	A	T	T	A	T	T	T	T	T	A	A	A	-	T		T	T	A/T	A	A	A	T	A/T	A	T	A/T	T	A/T	T	A
C8_35082	chr08	19530937	G	T	T	T	T	T	T	T	T	T	T	T	T	T	T	-	T		T	-	T	T	T	T	T	T	T	T	T	T	T	T	T
C8_35093	chr08	19592911	T	G	T	T	T	T	T	T	T	T	T	T	T	T	-	-	T		T	-	T	T	T	T	T	T	T	T	T	T	T	T	T
C8_35250	chr08	20851626	G	A	G	G	A	G	G	A	G	A	A	G	A/G	A	-	-	-		G	-	A	-	G	G	A	A	G	A	A	A	A	A	G
C8_35394	chr08	21826345	G	T	T	T	T	T	T	T	T	T	T	T	T	T	T	-	T		T	T	T	T	T	-	T	T	T	T	T	T	T	T	T
C8_35541	chr08	22841673	G	T	T	T	T	T	T	T	T	T	T	T	T	T	-	-	T		T	-	T	T	T	T	T	T	T	T	T	T	T	T	T
C8_35835	chr08	24874451	G	A	G	G	G	G	G	G	G	A	G	G	A/G	A	G	-	G		G	-	G	A/G	G	G	A	A	G	A	G	A	A	A	G
C8_35931	chr08	25511306	G	C	C	C	C	C	C	C	C	C	C	C	C	C	C	-	C		-	C	C	C	C	C	C	C	C	C	C	C	C	C	C
C8_36057	chr08	26354684	T	G	T	T	T	T	T	T	T	T	T	T	T	T	T	-	T		T	-	T	T	T	T	T	T	T	T	T	T	T	T	T
C8_36106	chr08	26691742	A	T	T	T	T	T	T	T	T	T	T	T	T	T	T	-	T		T	-	T	T	T	T	T	T	T	T	T	T	T	T	T
C8_36197	chr08	27173843	G	C	G	G	G	G	G	-	G	G	G	G	G	G	G	-	G		G	G	G	G	G	-	G	C	G	G	G	G	G	G	G
C8_36320	chr08	27784138	A	G	A/G	A	A	A	A	A	A	G	A/G	G	G	G	A/G	G	A/G		A	G	A	G	A	A	A/G	G	G	G	A/G	G	A/G	G	A/G
C9_40720	chr09	89935	C	T	T	T	T	C/T	T	C/T	T	T	C/T	T	T	T	C	-	C		-	-	T	C	T	-	T	T	C/T	T	C/T	-	C/T	C	T
C9_39671	chr09	263537	T	A	A	T	A	A	T	A	A	A	A/T	-	T	A	A	-	A		T	-	A	A	A	-	T	T	A	A/T	T	T	T	A	A
C9_39738	chr09	316354	C	T	T	C	T	T	C	T	T	C/T	C/T	T	C	T	C	C	T		C/T	C/T	T	T	T	C	C	C	T	C/T	C	C	C	T	T
C9_39772	chr09	331111	C	T	T	C	T	T	C	T	T	C/T	C/T	T	C	T	C	-	T		C/T	C/T	T	T	T	C	C	C	T	C/T	C	C	C	T	T
C9_38483	chr09	1518408	G	T	T	T	T	T	T	T	T	T	T	T	T	T	-	-	T		T	-	T	T	T	T	T	T	T	T	T	T	T	T	T
C9_39742	chr09	3190056	T	G	G	G	G	G	G	G	G	G	G	G	G	G	G	-	G		G	-	G/T	G	G	G	G	G	G	G	G	G	G	G	G
C9_39967	chr09	4630668	G	A	A	A	A	A	G	A	A	A/G	A/G	A	G	A	A/G	-	A		G	G	A	A	A	G	G	G	A	A/G	G	G	G	A	A
C9_39968	chr09	4630875	T	C	C	C	C	C	T	C	C	C/T	C/T	C	T	C	T	-	C		C/T	T	C	C	C	T	T	T	C	C	T	T	T	C	C
C9_39984	chr09	4656383	A	G	G	G	G	G	A	G	G	A/G	A/G	G	A	G	A	-	G		A/G	A/G	G	G	G	A	A	A	G	A/G	A	A	A	G	G
C9_40010	chr09	4699094	T	G	T	T	T	T	T	T	T	T	T	T	T	T	T	-	T		T	-	T	T	T	T	T	T	T	T	T	T	T	T	T
C9_40063	chr09	4970135	G	A	A	A	A	A	G	A	A	A/G	A/G	A	G	A	A/G	-	A		A/G	A	A	A	A	G	G	G	A	A/G	G	G	G	A	A
C9_40069	chr09	5025700	T	C	C	C	C	C	T	C	C	C/T	C/T	C	T	C	T	-	C		T	-	C	C	C	T	T	T	C	C/T	T	T	T	C	C
C9_40083	chr09	5096871	A	G	G	G	G	G	A	G	G	A/G	A/G	G	A	G	A	-	G		A/G	G	G	G	G	A	A	A	G	A/G	A	A	A	G	G
C9_40249	chr09	6000813	G	T	G	G	G	G	G	G/T	G/T	G	G	G	T	G	-	-	G		T	-	G	G	G	G	G	G	G	G	T	G	G/T	G/T	G
C9_40262	chr09	6072285	T	A	T	T	T	T	T	T	T	T	T	T	T	T	-	-	T		T	-	T	T	T	T	T	T	T	T	T	T	T	T	T
C9_40312	chr09	6293644	T	G	G/T	G	-	G	G	G	G	G	G	G	G	G	G	-	G		G	-	G	G	G	G	G	G	G	G	G	G	G	T	G
C9_40354	chr09	6567430	G	C	G	G	G	-	G	G	G	G	G	C	G	G	-	-	G		C	-	G	G	C	G	G	-	G	G	G	G	G	G	C
C9_40469	chr09	7335002	A	T	T	T	T	T	T	T	T	T	T	T	T	T	T	-	T		T	T	T	T	T	T	T	T	T	T	T	T	T	T	T
C9_40540	chr09	7829352	T	G	T	T	T	T	T	T	T	T	T	T	T	T	-	-	T		-	-	T	T	T	T	T	T	T	T	-	T	G	T	T
C9_40546	chr09	7878735	T	G	G	G	G	G	G	G	G	G	G	G	G	G	-	-	G		G	-	G	G	G	G	G	G	G	G	G	G	G	G	G
C9_40677	chr09	8703288	G	T	T	T	G	T	T	T	T	T	T	T	T	T	T	-	T		T	T	T	T	T	T	T	T	T	T	T	T	T	T	G
C9_37661	chr09	10256209	G	T	T	T	T	G/T	G	T	T	G/T	G/T	T	G	G/T	T	-	T		G	G	T	T	G	G	G	G	G/T	G/T	G/T	G	G	T	G
C9_37913	chr09	11850730	C	G	G	G	G	G	G	G	-	G	G	G	G	G	G	-	G		G	-	G	G	G	G	G	G	G	G	G	G	G	G	G
C9_38033	chr09	12489441	G	C	G	G	G	G	G	G	G	G	G	G	G	G	G	-	G		G	G	G	-	G	C	G	G	G	G	G	G	G	G	G
C9_38214	chr09	13486424	G	T	G	G/T	G	G	G	G	G	G	G	G	G	G	G	-	G		G	-	G	G/T	G	-	G	G	G	G	G	G	G	G	G
C9_38445	chr09	14976456	T	G	T	T	T	T	T	T	T	T	T	T	T	T	-	-	T		T	T	T	T	T	T	T	T	T	T	T	T	T	T	T
C9_38460	chr09	15076099	G	A	A	A	A	A/G	G	A	A/G	A	A/G	A	A/G	A/G	G	-	A		A	-	G	A/G	G	A	A	G	A/G	A/G	A	A/G	A	A	G
C9_38484	chr09	15185495	C	A	A	A	A	A/C	C	A	A/C	A	A	A	A/C	A/C	A	-	A		A/C	C	C	A/C	C	A	A	C	A/C	A/C	A	A	A	A	C
C9_38503	chr09	15311954	C	A	A	A	A	A/C	C	A	A/C	A	A/C	A	A/C	A/C	C	-	A		A/C	-	C	A/C	C	A	A	C	A/C	A/C	A	A/C	A	A	C
C9_38643	chr09	16308819	G	A	-	A	A	A	A	A	A	A	A	A	A	A	A	-	A		A	-	A	A	A	-	A	A	A	A	A	A	A	A	A
C9_38672	chr09	16504092	A	G	G	G	G	A	A	G	A	G	-	G	A/G	A	A	-	G		G	-	A	A	A	G	G	A	A/G	G	G	A	G	A/G	A
C9_38674	chr09	16504214	C	T	T	T	T	C	C	T	C/T	T	C	T	C/T	C/T	C	-	T		C/T	-	C	C	C	T	T	C	C/T	C	T	C	T	T	C
C9_38738	chr09	16912888	T	A	T	T	-	T	T	T	T	T	T	T	T	T	T	-	T		T	T	T	T	T	T	T	T	T	T	T	T	T	T	T
C9_38838	chr09	17520568	G	A	A	A	A	A	A	A	A	A	A	A	A	A	-	-	A		A	A	A	A	A	A	A	A	A	A	A	A	A	A	A
C9_38913	chr09	18045730	T	C	C	C	C	T	T	C	C/T	C	T	C	C/T	C/T	C/T	-	C		C/T	C	T	T	T	C	C	T	T	C/T	C	T	C	T	T
C9_38947	chr09	18283596	G	A	A	A	A	A	A	A	A	A	A	A	A	A	-	-	A		A	-	A	A	A	-	A	A	A	-	A	A	A	A	A
C9_39006	chr09	18786908	T	C	C	C	C	T	T	C/T	C/T	C	C/T	C	C/T	C/T	C/T	C	C/T		C/T	C	T	T	T	C	C	T	T	C/T	C/T	T	C	T	T
C9_39117	chr09	19543861	T	G	T	T	T	T	T	T	T	T	T	-	-	T	T	-	T		T	-	T	T	T	T	T	T	T	T	T	T	T	T	T
C9_39437	chr09	21667259	C	T	T	C	C	C	T	C/T	T	T	C/T	T	C	C	T	-	C/T		C	-	C	C	C	T	T	C	C	C/T	C/T	C	C	C	T
C9_39530	chr09	22229802	C	T	T	C	C	C	T	C/T	T	T	T	T	C	C/T	T	-	C/T		C	-	C	C	C	T	T	C	C/T	T	C/T	C	T	C	T
C10_43613	chr10	593246	G	A	A	A	A	A	A	A	G	G	A/G	G	A/G	A/G	A	-	A		G	-	A	A	G	-	G	G	A	G	G	G	A/G	G	-
C10_43829	chr10	709525	G	C	C	C	C/G	C	C	C	G	G	C/G	G	C	G	C/G	-	C		G	-	C	G	G	G	G	G	C	G	G	G	C	G	G
C10_43830	chr10	709622	G	A	A	A	A	A	A	A	G	G	A/G	G	A	A/G	-	-	A		G	-	A	G	G	G	G	G	A	G	G	G	A	G	G
C10_43840	chr10	720696	G	A	A	A	G	A	A	A	G	G	A	G	A	A/G	A/G	-	A		G	A	A	A/G	G	G	G	G	A	G	G	G	A	G	G
C10_43843	chr10	720915	A	G	G	G	A	G	G	G	A	A	A/G	A	G	A/G	A	-	G		A	G	G	A/G	A	A	A	A	G	A	A	A	G	A	A
C10_44026	chr10	829806	A	T	A	A	A	A	A	A	A	A	A	A	A	A	T	-	A		A	-	A	A	A/T	A	A	A	A	A	A	A	A	A	A
C10_41608	chr10	1365229	A	G	G	G	G	G	G	G	A	A	A/G	A	A	A/G	G	A	G		A	G	G	-	A	A	A	A	G	A	A	A	G	G	A
C10_41861	chr10	1521825	A	G	G	-	G	G	G	G	A	A	A	A	A	A	A/G	-	G		A	-	G	G	A	A	A	A	G	A	A	A	G	G	A
C10_43137	chr10	2584102	T	A	A	A	A/T	A	A	A/T	T	T	A/T	T	T	A/T	T	-	A/T		A/T	A	A	A	T	T	T	T	A	T	T	T	T	A	T
C10_43184	chr10	3022998	A	G	A	G	A/G	G	G	A/G	A	A	A/G	A	A	A/G	A	A	A/G		A/G	G	G	G	A	A	A	A	G	A	A	A	A	G	A
C10_43185	chr10	3035077	G	A	G	A	G	A	A	G	G	G	G	G	G	G	G	-	A/G		A/G	-	A	A	G	G	G	G	A	G	G	G	G	A	G
C10_43186	chr10	3035164	A	G	A	G	A	G	G	A	A	A	G	A	A	A	A	-	A/G		A/G	G	G	G	A	A	A	A	G	A	A	A	A	G	A
C10_43255	chr10	3505755	G	A	G	G	G	G	G	G	G	G	G	G	G	G	G	-	G		G	-	G	G	G	G	G	G	G	G	G	G	G	-	G
C10_43437	chr10	4582386	T	G	T	G	T	G	G	G/T	T	T	G/T	G	T	T	T	-	G		T	-	G/T	G	T	T	T	T	G/T	T	G	T	T	G	T
C10_43446	chr10	4655682	T	A	T	A	A/T	A	A	A/T	A/T	T	A/T	A	T	A/T	T	-	A/T		A/T	A	A/T	A	T	T	T	T	T	T	A/T	T	T	A	T
C10_43511	chr10	5150237	A	C	A	A	A	A	A	A	A	A	A	A/C	A	A	A	-	A		A	A	A	A	A	A	A	A	A	A	A	A	A	A	A
C10_43523	chr10	5292054	C	T	C	T	C	T	T	C	C/T	C	C/T	T	C	C/T	C	C	C/T		C/T	T	C/T	T	C	C	C	C	C	C	C/T	C	C	T	C
C10_43524	chr10	5292058	C	T	C	T	C/T	T	T	C	C/T	C	C/T	T	C	C/T	C	-	T		C/T	T	C/T	T	C	C	C	C	C	C	C/T	C	C	T	C
C10_43567	chr10	5667600	T	C	T	C	C/T	C	C	C/T	C/T	T	C/T	C	T	C/T	T	T	C		C/T	C	C/T	C	T	T	T	T	T	T	C/T	T	T	C	T
C10_43654	chr10	6190780	G	A	A	A	A	A	A	A	A	A	A	-	A	A	-	-	A		A	-	A	A	A	A	A	A	A	A	A	A	A	A	A
C10_43747	chr10	6694386	T	G	G/T	G/T	G	G	G	G/T	G	G	G	G	G	G	T	-	G		G	T	G	G	G	G	G	G	G	G	G	G	G	G	G
C10_43981	chr10	7954017	C	A	C	C	C	C	C	C	C	C	C	C	C	C	C	-	C		C	-	C	C	C	C	C	C	C	C	C	C	C	C	C
C10_44095	chr10	8838939	G	A	G	G	G	G	G	G	G	G	G	G	G	G	G	-	G		G	-	G	G	A/G	-	G	G	G	G	G	G	G	G	G
C10_44179	chr10	9303237	T	G	T	T	T	T	T	T	-	T	T	T	T	T	T	-	T		T	-	T	T	T	T	T	T	T	T	T	T	T	T	T
C10_40899	chr10	10148844	A	G	A	A	A	A	A	A	A	A	A	A	A	A	A	-	A		A	-	A	A	A	A	A	A	A	A	A	A	A	A	A
C10_40982	chr10	10733546	C	T	C	T	C/T	T	T	C	C/T	C	C/T	T	C	C/T	C	-	C/T		C/T	-	C/T	T	C	C	C	C	T	C	T	C	C	T	C
C10_41056	chr10	10835826	C	T	T	T	-	T	T	T	T	T	T	T	T	T	T	-	T		T	-	T	T	T	T	T	T	T	T	T	T	T	T	T
C10_41236	chr10	10919163	T	A	T	T	T	T	T	T	T	T	T	T	T	T	-	-	T		T	T	T	T	T	T	T	T	T	T	T	T	T	T	T
C10_41250	chr10	10974874	T	A	T	T	A	T	A	T	A	T	T	T	T	T	-	-	T		-	T	T	T	A/T	-	T	T	A/T	A	T	T	A	A/T	T
C10_41257	chr10	11058735	G	T	T	T	T	T	T	T	T	T	T	T	T	T	T	-	T		T	-	T	T	T	T	T	T	T	T	T	T	T	-	T
C10_41303	chr10	11264174	T	A	T	A	A/T	A	T	A/T	A/T	T	T	A	T	A/T	T	-	A/T		A/T	A	A/T	A	T	T	T	T	A	T	A	T	T	A	T
C10_41304	chr10	11267538	G	C	G	C	C/G	C	G	C/G	C/G	G	C/G	C	G	C/G	G	-	C/G		C/G	C	C/G	C	G	G	G	G	C	G	C	G	G	C	G
C10_41561	chr10	13246239	T	C	T	C	C/T	T	T	C	T	T	C/T	C	C/T	T	T	-	C		C/T	C	T	C	T	T	T	T	C	T	C	T	T	T	T
C10_41589	chr10	13460678	C	T	T	T	T	T	T	T	T	T	T	-	T	T	T	-	-		T	T	T	T	T	-	-	T	T	T	T	T	T	T	T
C10_41592	chr10	13486044	A	G	G	G	G	A	A	A	A	A	A	G	G	G	-	-	A/G		G	-	G	A	-	A	G	G	A	G	G	A	G	A	G
C10_41895	chr10	15403753	A	G	-	A	A	A	A	A	A	-	A	A	A	A	A	-	A		A	-	A	A	A	A	-	A	A	A	A	A	A	A	A
C10_41975	chr10	15996235	C	G	G	G	G	G	G	G	G	G	G	G	G	G	-	-	G		G	G	G	G	G	G	G	G	G	G	G	G	G	G	G
C10_42072	chr10	16507147	A	G	A	A	A	A	A	A	A	A	A	A	A	A	A	-	A		A	-	A	A	A	A	A	A	A	A	A	A	A	A	A
C10_42198	chr10	17546815	C	A	C	A	A	A	-	A	C	C	A	A/C	A	A	A/C	-	A		C	-	C	A	A/C	A	C	A	A	A	A	C	C	C	C
C10_42249	chr10	17890583	T	G	G	G	-	G	G	G	G	G	G	G	G	G	-	-	G		G	G	G	G	G	G	G	G	G	G	G	G	G	G	G
C10_42662	chr10	20469600	A	G	A	A	A	A	A	A	A	A	A	-	A	A	-	-	A		A	-	A	A	A	A	A	A	A	A	A	A	A	A	A
C10_42692	chr10	20504985	T	G	G	G	-	G	G	G	G	G	G	G	G	G	G	-	G		G	G	G	G	G	G	G	G	G	G	G	G	G	G	G
C10_42693	chr10	20507557	G	C	C	C	C	C	C	C	C	C	C	C	C	C	C	-	C		C	-	C	C	-	C	-	C	C	C	C	C	C	-	C
C10_42745	chr10	20828874	G	T	T	T	T	T	T	T	T	T	T	-	T	T	T	-	T		T	-	T	T	T	-	-	T	T	T	T	T	T	T	T
C10_42850	chr10	21413907	T	G	T	G	G	G	G	G	G	G	G	G	G	G	G	-	G		G	-	G	T	G	G	G	-	G	G	G	G	G	G	-
C10_43022	chr10	22568771	T	G	G	G	G	G	G	G	G	G	G	G	G	G	G	-	G/T		G	G	G/T	G	G	G	G	G	G	G	G	G	G	G	G
C10_43073	chr10	22955622	G	A	G	G	G	G	G	G	G	G	G	G	G	G	G	-	G		G	-	G	G	G	G	G	G	G	G	G	G	G	G	G
C11_44955	chr11	1413735	C	T	T	C/T	T	T	C	T	C	T	C	T	T	T	C	-	T		T	-	C/T	T	C/T	T	T	T	T	T	C/T	T	C/T	C/T	T
C11_45379	chr11	1672954	A	C	-	C	C	C	C	C	C	C	C	C	C	C	C	-	C		C	C	C	C	C	C	C	C	C	C	C	C	C	C	C
C11_45757	chr11	1911008	A	C	A	C	A/C	A	A/C	A/C	A/C	A	A/C	A	A	A	A	-	C		C	A	A/C	A	A/C	A/C	C	A	A/C	A/C	A	A/C	C	A/C	A
C11_45854	chr11	1967605	G	T	G	G	G	G	G	G	G	G	G	G	G	G	-	-	G		-	-	G	G	G	G	G	G	G	G	G	G	G	G	G
C11_46933	chr11	2670518	A	T	-	T	T	T	T	T	-	T	T	T	T	T	T	-	T		T	T	T	T	T	T	T	T	T	T	-	T	T	T	-
C11_47275	chr11	3010079	T	G	G	G	G	G	G	G/T	G	G	G	G	G	G	-	-	G/T		G	-	T	G	G	G	G/T	G/T	G/T	G	G	G	G	G	G
C11_47365	chr11	3536839	C	T	T	T	C	C	T	C/T	C	C	T	C	T	T	C/T	-	C/T		T	C	T	C	C	C	T	C	C	C	T	T	T	C/T	C/T
C11_47464	chr11	3981733	A	G	G	G	G	A	A/G	A	A	A	A	G	G	G	G	-	G		G	-	G	A	G	A	G	G	A	G	G	A	G	A	G
C11_47523	chr11	4276938	T	C	T	T	-	T	T	T	T	T	T	T	T	T	T	-	T		-	-	T	T	T	T	T	T	T	T	T	T	T	T	T
C11_47535	chr11	4344612	C	T	T	T	T	C	C	C/T	C	C/T	T	C	T	T	C	-	T		T	C	T	C	T	C	T	C	C	C	T	C/T	T	C/T	T
C11_47585	chr11	4735110	C	A	A	A	A	C	A/C	-	C	A	A	C	A	A	A	-	A		A	C	A	-	A	C	A	C	C	C	A	A/C	A	A/C	A
C11_47590	chr11	4746471	T	G	G	G	G	T	G	G	T	G	G	T	G	G	T	-	G		G	-	G	T	G	T	G	T	T	T	G	T	G	G/T	G
C11_47633	chr11	5061120	C	T	T	T	T	C	C/T	T	C	T	T	C	T	T	C/T	-	T		T	C	T	C	T	C	T	C	C	C	T	C/T	T	C/T	T
C11_47655	chr11	5215057	A	G	G	G	-	A	A	A/G	A	G	G	A/G	G	G	A	-	G		G	-	G	A	G	A	G	A	A	A	G	A	G	A	G
C11_47668	chr11	5312582	T	C	T	C/T	C	T	T	C/T	T	C/T	C/T	-	T	C/T	T	-	T		C/T	-	C	T	C/T	T	T	T	T	T	C/T	T	C/T	T	T
C11_47730	chr11	5738277	T	C	C	C	C	T	C/T	C	T	C	C	T	C	C	C	-	C		C	T	C	T	C	T	C	T	T	T	C	C/T	C	C/T	C
C11_47832	chr11	6205817	G	A	A	A	A	G	G	A	G	A	A	G	A	A	-	-	A		A	-	A	G	A	G	A	G	G	G	A	A/G	A	A/G	A
C11_47856	chr11	6357798	C	T	C	C	C	-	C	C	C	C	C	-	C	C	C	-	C		C	C	C	C	C	C	C	C	C	C	C	C	C	C	C
C11_47922	chr11	6818866	T	C	T	T	T	T	T	T	T	T	T	T	T	T	T	-	T		T	-	T	T	T	T	T	T	T	T	T	T	T	T	T
C11_48227	chr11	8949025	T	C	C	C	-	T	T	T	T	T	T	C	C	C	T	-	C/T		C	T	C	T	C	T	C	T	T	C	C	T	C	T	C
C11_48236	chr11	9006055	G	T	T	T	T	G	G/T	G/T	G	G/T	G/T	T	T	T	G	G	T		T	G	T	G	T	G	T	G	G	T	T	G/T	T	G	T
C11_48311	chr11	9439743	C	T	T	T	T	C	C	C/T	C	T	C/T	T	T	T	C	-	T		T	-	T	C	T	C	T	T	C	T	T	T	T	C	T
C11_44315	chr11	10146891	T	A	A	A	A/T	A	A	A/T	T	T	A/T	T	T	A/T	T	-	A/T		A/T	A	A	A	T	T	T	T	A	T	T	T	T	A	T
C11_44335	chr11	10298071	A	G	G	G	G	A	A	G	A	G	A/G	G	G	G	G	-	G		G	G	G	A	G	A	G	G	A	G	G	A	G	A	G
C11_44615	chr11	11880673	C	G	C	C	-	C	C	C	C	C	C	C	C	C	C	-	C		C	-	C	C	C	C	C	C	C	C	C	C	C	C	-
C11_44683	chr11	12693312	A	T	T	T	T	A	T	T	T	A	-	T	T	-	-	-	A		T	-	T	T	T	T	A/T	T	A	T	T	T	T	A	T
C11_44756	chr11	13032306	G	A	A	A	A	A	A	A	A	A	A	A	A	A	-	-	A		A	-	A	A	A	A	A	A	A	A	A	A	A	A	A
C11_44771	chr11	13124868	G	A	A	A	A	A	A	A	A	A	A	A	A	A	A	-	A/G		A	-	A	A	A	A	A	A	A	A	A	A	A	A	A
C11_44782	chr11	13156975	T	C	C	C	C	C	C	C	C	C	C	C	C	C	C	-	C		C	-	C	C	C	C	C	C	C	C	C	C	C	C	C
C11_44794	chr11	13222395	G	T	T	T	T	T	T	T	T	T	T	T	T	T	T	-	T		T	-	T	T	T	-	T	T	T	T	T	T	T	T	T
C11_45022	chr11	14591653	T	G	G	G/T	G	G	G/T	G	G	G	G	G	G	G	G	-	T		G	-	G/T	G/T	G	G	G	G	G	G	G/T	G/T	G/T	G/T	G
C11_45055	chr11	14819833	C	A	A	A	A	C	A/C	A/C	C	C	A/C	A	A	A	A	-	A		A	A	A	C	A	C	A	A	C	A	A	A/C	A	C	A
C11_45068	chr11	14896438	G	A	A	A	A	G	A/G	A/G	G	G	A/G	A	A	A	A	-	A		A	A	A	G	A	G	A	A	G	A	A	A/G	A	G	A
C11_45264	chr11	15990257	A	G	G	G	G	A	A/G	A/G	A	A	A/G	G	G	G	G	-	G		G	G	G	A	G	A	G	G	A	G	G	A/G	G	A	G
C11_45305	chr11	16183112	G	T	T	T	-	T	T	T	-	T	T	T	T	T	-	-	T		T	-	T	T	T	T	T	T	T	T	T	T	T	T	T
C11_45317	chr11	16248330	A	G	G	A	A	A	G	G	A/G	A	A/G	G	A/G	A/G	A	-	G		A	G	G	A/G	G	A	G	A/G	A	A	G	A/G	G	A	G
C11_45349	chr11	16520487	A	G	G	G	G	A	A/G	A/G	A	A	A/G	G	G	G	G	-	G		G	G	G	A	G	A	G	G	A	G	G	A/G	G	A	G
C11_45448	chr11	17094752	T	A	A	A	A	T	A/T	A/T	A/T	T	A/T	A	A	A	A	-	A		A	A	A	T	A	T	A	A	T	A	A	A/T	A	T	A
C11_45597	chr11	18052411	T	C	C/T	T	C	T	C	T	T	T	C/T	C	C/T	T	C/T	-	T		T	T	C	T	C	T	C/T	C/T	T	T	C/T	T	T	C/T	C
C11_45704	chr11	18804198	C	T	T	C	T	C	T	T	C/T	C	C/T	T	C/T	T	C	-	T		C/T	T	T	T	T	C	T	T	C	T	T	C/T	T	C	T
C11_45795	chr11	19400731	T	G	G	G	G	G	G	G	G	G	G	G	G	G	G	-	G		G	G	G	G	G	G	G	G	G	G	G	G	G	G	G
C11_45824	chr11	19525078	A	G	A	A	A	A	A	A	A	A	A	A	A	A	-	-	A		A	-	A	A	A	A	-	A	A	A	A	A	A	A	A
C11_45836	chr11	19608669	A	G	G	A	A	A	G	G	A/G	A	A/G	G	A/G	A/G	A	-	G		A	-	G	G	G	A	G	A/G	A	A/G	G	A/G	G	A	G
C11_45838	chr11	19609011	G	A	A	G	A	G	A	A	A	A	A	A	A	A	A	A	A		A/G	A	A	A	A	A	A	A	G	A	A	A	A	G	A
C11_45841	chr11	19610013	G	A	A	G	G	G	A	A	G	G	A/G	A	A/G	A/G	G	-	A		G	A	A	A	A	G	A	A	G	A/G	A	A	A	G	A
C11_45901	chr11	20012300	A	G	G	A	A	A	G	G	A/G	A	A/G	G	A/G	A/G	A	-	G		A	G	G	A/G	G	A	G	A/G	A	A	G	A/G	G	A	G
C11_45975	chr11	20504651	C	T	T	C	C	C	T	C	C/T	C	C/T	T	C/T	C/T	C/T	-	C		C	-	T	C/T	T	C	T	C/T	C	C	T	T	T	C	C
C11_46061	chr11	20971441	A	C	C	C	C	C	C	C	C	C	-	C	C	C	C	-	C		C	-	-	C	C	C	C	C	C	C	C	C	C	C	C
C11_46123	chr11	21300906	G	A	-	A	A	A	A	A	G	A	A	A	A	A	A	-	A		-	-	-	A	A	A	A	A	A	A	A	A	A	A	A
C11_46141	chr11	21407421	T	G	T	T	T	T	T	T	T	T	T	T	T	T	T	-	T		T	-	T	T	T	T	T	T	T	T	T	-	T	T	T
C11_46147	chr11	21469295	G	T	G	G	T	G	G	G	G	G	G	G	G	G	G	-	G		-	-	G	G	G	G	G	G	G	G	G	G	G	G	G
C11_46203	chr11	21767598	T	G	G	G	G	G	G	G	G	G	G	G	G	G	G	-	G		G	-	G	G	G	-	G	G	G/T	G	G	G	G	G	G
C11_46204	chr11	21767684	T	G	G	G	G/T	G	G	G	G	G	G	G	G	G/T	G	-	G		G	-	G	G	G	G	G	G	G	G	G	G	G	G	G
C11_46230	chr11	21896259	A	C	A	A	A	A	A	A	-	A	A	A	A	A	A	-	A		A	A	A	A	A	A	A	A	A	A	A	A	A	A	A
C11_46269	chr11	22116183	A	T	A/T	A	A	A	T	A	A/T	A	A	T	A/T	A	A	-	A		A	T	T	A	T	T	T	A/T	T	A	T	T	T	A	A
C11_46415	chr11	23062596	G	T	T	T	T	T	T	T	T	T	T	T	T	T	T	-	T		T	T	T	T	T	T	T	T	T	T	T	T	T	T	T
C11_46594	chr11	24304828	A	C	A/C	A	A	A	C	A	A/C	A	A	C	A/C	A	C	-	A		A	-	C	A/C	C	A	C	A/C	A/C	A	C	A	C	A	A
C11_46633	chr11	24662677	T	C	C/T	T	T	T	C	T	C/T	T	C/T	C	C/T	T	T	-	T		T	-	C	T	C	T	C	C/T	C/T	T	C	T	T	T	T
C11_46747	chr11	25328946	C	T	T	T	-	T	T	T	T	T	T	T	T	T	T	-	T		T	-	T	T	T	T	T	T	T	T	T	T	T	T	T
C11_46834	chr11	25927613	T	C	C	C/T	C	C	C/T	C	C	C/T	C/T	-	C/T	C	T	-	C		C	T	-	C	C	T	C/T	T	C	C	C/T	C/T	C/T	C	-
C11_46842	chr11	26057497	T	G	T	T	G	T	G	T	T	T	G	G	G/T	T	G	-	T		T	-	G	T	G	T	G	G/T	T	T	G	T	T	T	G
C11_46845	chr11	26099944	T	C	C/T	T	C	T	C	T	T	T	C/T	C	C/T	T	C/T	C	T		T	T	C	T	C	T	C/T	C/T	T	T	C	T	T	C/T	C
C11_46882	chr11	26342507	T	C	T	T	C	T	C	T	T	T	C/T	C	C/T	T	C/T	-	T		T	T	C	T	C	T	C/T	C/T	T	T	C/T	T	T	C/T	C
C11_46961	chr11	26976520	C	T	C/T	C	T	C	T	C	C	C	C/T	T	C/T	C	C/T	-	C		C	C	T	C	T	C	C/T	C/T	C	C	C/T	C	C	C/T	T
C11_46993	chr11	27149962	C	T	C	C	T	C	T	C	C	C	C/T	T	C/T	C	C/T	-	C		C	-	T	C	T	C	T	C/T	C	C	T	C	C	C/T	T
C11_47039	chr11	27384465	A	G	A/G	A	G	A	G	A	A	A	G	G	G	A	G	-	A		A	-	G	A	G	A	A/G	A/G	A	A	A/G	A	A	A/G	G
C11_47047	chr11	27414496	T	G	G	G	G	G	G	G	G	G	G	G	G	G	G	-	G		G	-	G	G	G	G	G	G	G	G	G	G	G	G	G
C11_47127	chr11	28104177	T	C	T	T	C	T	C	T	T	T	C	C	C/T	T	C	-	T		T	T	C	T	C	T	C	C	T	T	C/T	T	T	T	C
C11_47184	chr11	28456708	C	A	C	A/C	A	A/C	A	C	A/C	A/C	A	A	A	A/C	C	-	A/C		C	-	-	C	A	C	A	A	A/C	A	A/C	C	A/C	C	A
C12_49897	chr12	182468	G	A	A	A	A	A	A	A	A	A	A	A	A	A	A	-	A		-	A	A	A	A	A	A	A	A	A	A	A	A	A	A
C12_48579	chr12	1114540	G	T	T	T	T	T	-	T	T	G/T	G	G/T	G/T	G/T	-	-	T		T	-	T	T	T	T	G	T	T	T	G/T	G/T	T	T	G/T
C12_48628	chr12	1143033	G	A	G	G	-	G	G	G	G	G	G	G	G	G	-	-	G		G	-	G	G	G	-	G	G	G	G	G	G	G	G	G
C12_48778	chr12	1214208	T	G	G	G	G	G	G	G	G	G	G	G	G	G	-	-	G		G	-	G	G	G	G	G	G	G	G	G	G	G	G	G
C12_50800	chr12	2267212	T	G	G	G	G	G	G	G	G	G	G	G	G	G	-	-	G		G	-	G	G	G	G	G	G	G	G	G	G	G	G	G
C12_50865	chr12	2310866	G	A	A	G	A	A	G	A	G	G	-	G	G	A	G	-	A		A	-	A	A/G	G	A	G	A	A/G	A	G	A	A/G	G	G
C12_51586	chr12	3059831	G	A	G	A/G	A	A	A	A	A/G	G	A/G	A/G	G	A	G	-	A		A/G	A	A	A/G	G	A	G	A	A/G	A	A	A	A	G	A
C12_51642	chr12	3328644	A	C	C	C	C	C	C	C	C	C	C	C	C	C	C	-	C		C	C	C	C	C	C	C	C	C	C	C	C	C	C	C
C12_51704	chr12	3723148	G	T	G	G/T	G	G/T	G/T	G	G	G	G/T	G	G	G/T	G	-	G		G	T	G/T	G	G	G/T	G	G	G	G	G/T	G/T	G	G	G/T
C12_51742	chr12	3917998	T	C	T	C/T	C	C	C	C	C	T	C/T	C/T	T	C	T	-	C		C	-	C	C	T	C	T	C	C/T	C	C	C	C	T	C
C12_51876	chr12	4840223	T	G	G	G	G	G	G	G	G	G	G	G	G	G	G	-	G		G	G	G	G	G	G	G	G	G	G	G	G	G	G	G
C12_51925	chr12	5151258	T	C	C	C	T	C	-	C	C	C	C	C	T	C	T	-	C		C	C	C	T	T	C	T	C	T	C	C	C	C	T	C
C12_51932	chr12	5232367	G	C	C	C	C	C	C	C	C	C	C	C	C	C	C	-	C		C	-	C	C	C	C	C	C	C	C	C	C	C	C	C
C12_52309	chr12	6883848	A	T	T	A/T	A	T	T	T	T	T	A/T	T	A/T	T	A	-	T		A/T	-	T	T	A	T	A	T	A/T	T	T	T	T	A/T	T
C12_52338	chr12	7096640	G	A	A/G	A/G	G	A	A	A	A	A	A/G	A	A/G	A	G	-	A		A/G	A	A	A/G	G	A	G	A	A/G	A	A	A	A	A/G	A
C12_52586	chr12	8580587	C	T	T	T	C	T	T	T	T	T	C	C	C	T	T	-	T		C	-	T	T	C	T	C	T	C/T	T	T	T	T	C	C
C12_52595	chr12	8614026	T	G	G	G	G/T	G	G	G/T	G	G	G	T	G	G/T	-	-	G		G	-	G	T	G	G	G	G/T	G	G	G	G	G	G	G
C12_52736	chr12	9487477	T	G	G	G	G	G	G	G	G	G	G	G	G	G	G	-	G		G	-	G	G/T	G	G	G	G	G	G	G/T	G	G	G	G
C12_52757	chr12	9644942	A	C	C	A/C	A	C	C	C	C	A/C	C	A	A/C	C	A	-	C		A/C	C	C	A	A	C	C	C	A/C	C	A/C	C	C	A	A
C12_52766	chr12	9698712	C	T	T	C/T	C	T	T	T	T	C/T	C/T	C	C/T	T	C	-	T		C/T	-	T	C	C	T	T	T	C/T	T	C/T	T	T	C	C
C12_48509	chr12	10691515	G	A	A	A/G	G	A	A	A	A	A	A/G	G	A/G	A	G	-	A		A/G	A	A	G	G	A	A	A	A/G	A	A/G	A	A	G	G
C12_48676	chr12	11538441	T	C	T	T	T	T	-	T	T	T	T	T	T	T	T	-	T		T	T	T	T	T	T	T	T	T	T	T	T	T	T	T
C12_48730	chr12	11767354	A	T	T	T	T	T	T	T	T	T	T	T	T	T	T	-	T		T	-	T	T	T	T	T	T	T	T	T	T	T	T	T
C12_48873	chr12	12636166	C	T	T	C/T	C	T	T	T	T	T	T	C	C	T	C	-	T		T	-	T	C	C	-	T	T	C/T	C	T	T	T	C	C
C12_48888	chr12	12673784	C	G	G	G	G	G	G	G	G	G	G	G	G	G	G	-	G		G	-	G	G	G	G	G	G	G	G	G	G	G	G	G
C12_49066	chr12	13676102	T	G	G	G/T	T	G	G	G	G	G	G/T	T	G/T	G	T	G	G		G/T	G	G	T	T	G	G	G	G/T	T	G/T	G	G	T	T
C12_49141	chr12	14148848	T	G	T	T	T	T	T	T	T	T	T	T	T	T	T	-	T		T	-	T	T	T	T	T	T	T	T	T	T	T	T	T
C12_49160	chr12	14279878	A	C	A/C	A/C	A	C	C	C	C	C	A/C	A	A	C	A	-	C		A	C	C	A	A	C	C	C	A/C	A	C	C	C	A	A
C12_49228	chr12	14668685	A	C	C	A/C	C	C	C	C	-	C	C	C	-	C	C	-	C		C	-	C	A	C	C	C	C	C	C	C	C	C	C	C
C12_49425	chr12	15622155	A	T	T	T	T	T	T	T	T	T	T	T	T	T	T	-	T		T	-	T	T	T	T	T	T	T	T	T	T	T	T	T
C12_49509	chr12	15990043	G	A	G	A/G	G	A	A/G	A	A	A	A	G	A/G	A	G	A	A		G	A	A	G	G	A	A	A	A/G	G	A	A	A	G	G
C12_49511	chr12	15997545	T	A	A	A	A	A	A	A	A	A	A	T	A	A	A	-	A		A	A	T	A	A	A	A	A	-	T	-	T	A/T	A	A
C12_49612	chr12	16504890	T	C	T	C/T	C	C	C/T	C	C	C	C	T	T	C	T	-	C		T	C	C	T	T	C	C	C	C/T	C/T	C	C	C	T	T
C12_49618	chr12	16531941	A	G	A	A/G	G	G	A/G	G	G	G	G	A	A/G	G	A	-	G		A	G	G	A	A	G	G	G	A/G	A/G	A/G	G	G	A	A
C12_49682	chr12	16932169	G	A	G	A	A	A	A	A	A	A	A	G	A	A	G	-	A		G	-	A	A	G	A	A	A	A	A	A	A	A	G	G
C12_49752	chr12	17508680	G	C	C	C	-	C	C	C	C	C	C	C	C	C	C	-	C		C	-	C	C	C	C	C	C	C	C	C	C	C	C	C
C12_49899	chr12	18251501	A	C	A	A	A	A	A	A	A	A	A	C	A	A	A	-	A		A	A	A	A	A	A	A	A	A	A	A	A	A	A	A
C12_50030	chr12	19072076	A	G	A	G	G	G	G	G	G	G	G	A	A/G	G	A	-	G		G	-	G	A	A	G	G	G	A/G	G	A	G	G	A	A/G
C12_50070	chr12	19308475	G	T	T	T	T	T	T	T	T	T	T	T	T	T	T	-	T		T	-	T	T	T	T	T	T	T	T	T	T	T	T	T
C12_50117	chr12	19604331	T	C	T	T	T	T	T	T	T	T	-	T	T	T	T	-	T		T	-	T	T	-	T	T	T	T	T	C/T	T	T	T	T
C12_50147	chr12	19740687	T	A	T	T	A	A	A	A	A	A	A	T	A	A	A/T	-	A		A	A	A	A	T	A	A	A	A	A	T	A	A	T	A
C12_50148	chr12	19756588	G	T	T	T	T	T	T	T	T	T	T	T	T	T	T	-	T		T	T	T	T	T	T	T	T	T	T	T	T	T	T	T
C12_50235	chr12	20377634	T	C	T	T	T	T	T	T	T	T	T	T	T	T	T	-	T		T	-	T	T	T	T	T	T	T	T	T	T	T	T	T
C12_50363	chr12	20580308	T	G	G	G	G	G	G	G	G	G	G	G	G	G	G	-	G		G	-	G	G	G	G	G	G	G	G	G	G	G	G	G
C12_50765	chr12	22424211	G	T	G	T	T	T	G	T	G/T	T	T	G	T	G	G	-	T		T	-	T	G	G	T	G	T	T	G/T	G	T	T	G	T
C12_50766	chr12	22424290	T	G	T	G	G	G	T	G	G/T	G	G	T	G	T	T	-	G		G	-	G	T	T	G	T	G	G	G/T	T	G	G	T	G
C12_50932	chr12	23392596	A	T	A	T	A	T	A	T	T	T	T	A	T	T	-	-	T		T	T	T	A	A	T	A	T	T	A	A	A	T	A	T
C12_50963	chr12	23516666	C	T	C	T	C	T	C	T	C/T	T	T	C	T	C	C	T	T		T	T	T	C	C/T	T	C	T	T	C/T	C	C/T	C/T	C	T
C12_51098	chr12	24577816	C	T	T	T	T	T	T	T	T	T	T	T	T	T	T	-	T		T	T	T	T	T	T	T	T	T	T	T	T	T	T	T
C12_51144	chr12	24945936	T	A	A	A	A	A	A	A	A	A	A	A	A	A	A	-	A		A	-	A	A	A	A	A	A	A	A	A	A	A	A	A
C12_51179	chr12	25133783	C	A	-	A	A	A	A	C	A	A	A	-	-	C	C	-	A		C	-	A/C	A	A/C	A	A	C	A/C	C	A	C	A	A/C	C
C12_51183	chr12	25137176	T	C	C	C	C	C	C	C	C	C	C	C	C	C	C	-	C		C	C	C	C	C	C	C	C	C	C	C	C	C	C	C
C12_51267	chr12	25852222	C	T	C	C	C	C	C	C	C	C	C	C	C	C	C	-	C		C	C	C	C	C	C	C	C	C	C	C	C	C	C	C
C12_51463	chr12	27015074	T	G	T	T	T	T	T	T	T	T	T	T	T	T	T	-	-		T	-	T	T	T	G	T	T	T	T	T	T	T	T	T
