# Supplementary material
Source: publisher figshare collection journal article supplement (https://gsajournals.figshare.com/articles/dataset/_/7506041)
Supplement: Supplementary file 1 [file 1]

**Supplemental Table S 1** SNPs showing distortion from 1 : 1 in allele frequency between A58- and Kitaake-type in early- and late- heading groups at  $p < 0.05$

| Marker name | Chr | Position * | $\chi^2$ | $P$   |
|-------------|-----|------------|----------|-------|
| C1_2871     | 1   | 2952301    | 4.00     | 0.046 |
| C1_2292     | 1   | 25250821   | 4.02     | 0.045 |
| C1_2301     | 1   | 25270205   | 4.02     | 0.045 |
| C1_2745     | 1   | 28608975   | 5.37     | 0.020 |
| C1_2968     | 1   | 30128355   | 3.88     | 0.049 |
| C2_10782    | 2   | 790734     | 7.48     | 0.006 |
| C2_10784    | 2   | 790866     | 7.48     | 0.006 |
| C2_8013     | 2   | 22155575   | 6.24     | 0.012 |
| C4_19210    | 4   | 29823605   | 7.05     | 0.008 |
| C4_19304    | 4   | 30511751   | 9.88     | 0.002 |
| C4_19390    | 4   | 31264195   | 12.00    | 0.001 |
| C4_19586    | 4   | 32438249   | 7.76     | 0.005 |
| C6_29170    | 6   | 8746766    | 3.96     | 0.047 |
| C6_27238    | 6   | 24515347   | 6.74     | 0.009 |
| C6_27270    | 6   | 24574372   | 4.55     | 0.033 |
| C6_27338    | 6   | 24978329   | 6.17     | 0.013 |
| C6_27340    | 6   | 24985031   | 6.51     | 0.011 |
| C6_27365    | 6   | 25230125   | 4.57     | 0.032 |
| C6_27415    | 6   | 25515786   | 5.42     | 0.020 |
| C7_30353    | 7   | 16122146   | 5.24     | 0.022 |
| C7_31845    | 7   | 26143870   | 5.84     | 0.016 |
| C9_39967    | 9   | 4630668    | 3.90     | 0.048 |
| C9_37661    | 9   | 10256209   | 6.60     | 0.010 |
| C10_43613   | 10  | 593246     | 4.55     | 0.033 |
| C10_43829   | 10  | 709525     | 4.57     | 0.032 |
| C10_43830   | 10  | 709622     | 6.58     | 0.010 |
| C11_46269   | 11  | 22116183   | 5.31     | 0.021 |

\*Nucleotide position is based on the Nipponbare genome sequence (IRGSP1.0)

**Supplementary Table S2** The effect of the selected SNPs on days to heading (DTH) in F4 lines derived from the cross between A58 and Kitaake in 2015 and 2016

| SNP Marker | Chr. | Position   | DTH (2015) |              |      | DTH (2016) |              |      |
|------------|------|------------|------------|--------------|------|------------|--------------|------|
|            |      |            | A58-type   | Kitaake-type | MGV* | A58-type   | Kitaake-type | MGV* |
| C1_2292    | 1    | 25,250,821 | 68.5±2.02  | 73.6±1.78    | 2.6  | 75.9±1.72  | 79.3±1.72    | 1.7  |
| C1_2301    | 1    | 25,270,205 | 68.5±2.02  | 73.6±1.78    | 2.6  | 75.9±1.72  | 79.3±1.72    | 1.7  |
| C1_2745    | 1    | 28,608,975 | 68.1±1.85  | 73.4±1.54    | 2.7  | 75.3±1.59  | 79.0±1.52    | 1.9  |
| C1_2968    | 1    | 30,128,355 | 66.9±1.96  | 72.7±1.66    | 2.9  | 74.1±1.94  | 78.1±1.46    | 2.0  |
| C2_10782   | 2    | 790,734    | 68.1±1.83  | 71.8±1.59    | 1.9  | 74.8±1.65  | 78.1±1.47    | 1.7  |
| C2_10784   | 2    | 790,866    | 68.1±1.83  | 71.8±1.59    | 1.9  | 74.8±1.65  | 78.1±1.47    | 1.7  |
| C4_19210   | 4    | 29,823,605 | 74.8±1.14  | 66.6±1.61    | 4.1  | 81.9±0.65  | 73.7±1.34    | 4.1  |
| C4_19304   | 4    | 30,511,751 | 76.3±1.03  | 66.1±1.61    | 5.1  | 82.1±0.72  | 73.2±1.43    | 4.5  |
| C4_19390   | 4    | 31,264,195 | 76.9±1.08  | 65.1±1.39    | 5.9  | 82.5±0.74  | 72.5±1.3     | 5.0  |
| C4_19586   | 4    | 32,438,249 | 75.5±1.21  | 65.7±1.43    | 4.9  | 81.6±0.68  | 72.9±1.31    | 4.3  |
| C6_27238   | 6    | 24,515,347 | 71.9±1.72  | 65.7±1.91    | 3.1  | 77.2±1.78  | 73.8±1.62    | 1.7  |
| C6_27270   | 6    | 24,574,372 | 71.1±1.64  | 66.6±2.03    | 2.3  | 76.5±1.78  | 75.1±1.51    | 0.7  |
| C6_27338   | 6    | 24,978,329 | 71.3±1.78  | 65.2±2.16    | 3.1  | 76.9±1.67  | 73.3±1.92    | 1.8  |
| C6_27340   | 6    | 24,985,031 | 71.7±1.57  | 66.0±2.24    | 2.9  | 77.6±1.53  | 74.5±1.74    | 1.6  |
| C6_27365   | 6    | 25,230,125 | 71.5±1.67  | 66.9±2.21    | 2.3  | 77.3±1.59  | 75.1±1.67    | 1.1  |
| C6_27415   | 6    | 25,515,786 | 71.5±1.67  | 66.6±2.03    | 2.5  | 77.3±1.59  | 75.1±1.51    | 1.1  |
| C10_43613  | 10   | 593,246    | 71.9±1.68  | 64.4±1.93    | 3.8  | 77.3±1.42  | 72.1±1.9     | 2.6  |
| C10_43829  | 10   | 709,525    | 72.5±1.4   | 65.7±2.28    | 3.4  | 78.1±1.22  | 73.3±2.42    | 2.4  |
| C10_43830  | 10   | 709,622    | 72.8±1.47  | 65.7±2.06    | 3.6  | 78.2±1.3   | 73.5±2.2     | 2.4  |

\* MGV (marker genotype value) is an indication of the effect of each SNP locus based on DTH as described in the Materials and methods.

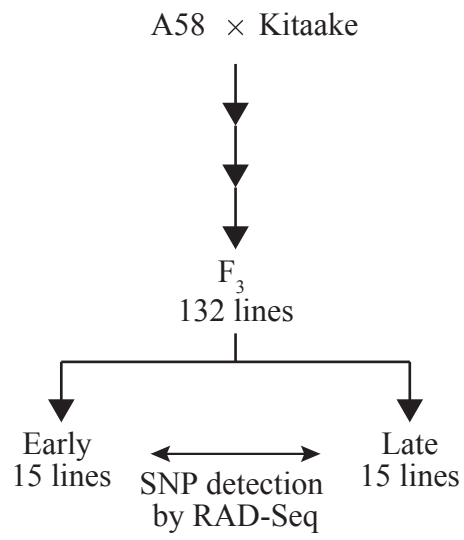

Supplementary Figure S1: Experimental scheme of this study.

The ddRAD-Seq analysis was completed to detect differences in the allele frequency of genome-wide SNPs between early- and late-heading F4 lines.

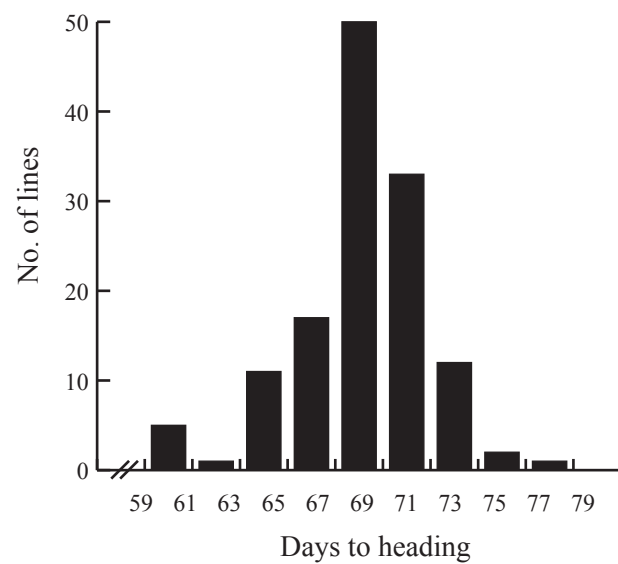

Supplementary Figure S2: Frequency distribution of DTH in the F3 population derived from the A58  $\times$  Kitaake cross.

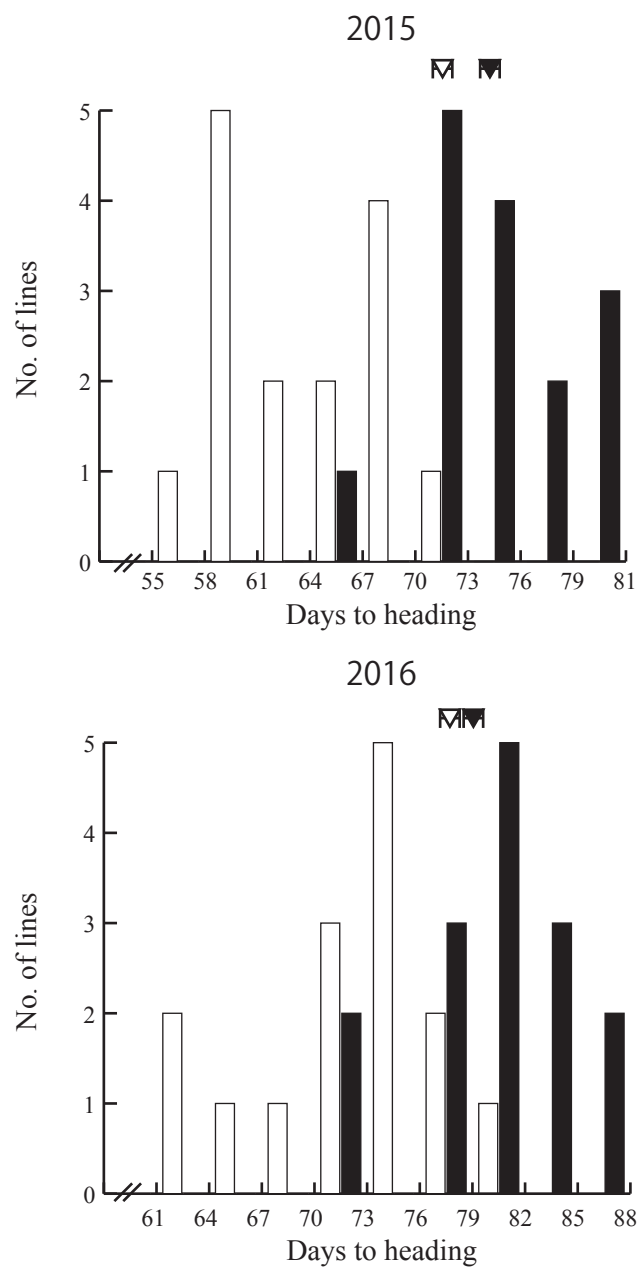

Supplementary Figure S3: Frequency distribution of DTH in early- and late-heading F4 lines derived from the A58 × Kitaake cross in 2015 and 2016.

The DTH of the 15 early-heading and 15 late-heading F4 lines was examined in 2015 and 2016. Early- and late-heading lines are indicated by white and black, respectively. Kitaake and A58 DTH are indicated by white and black arrowheads, respectively, with bars representing the standard error.

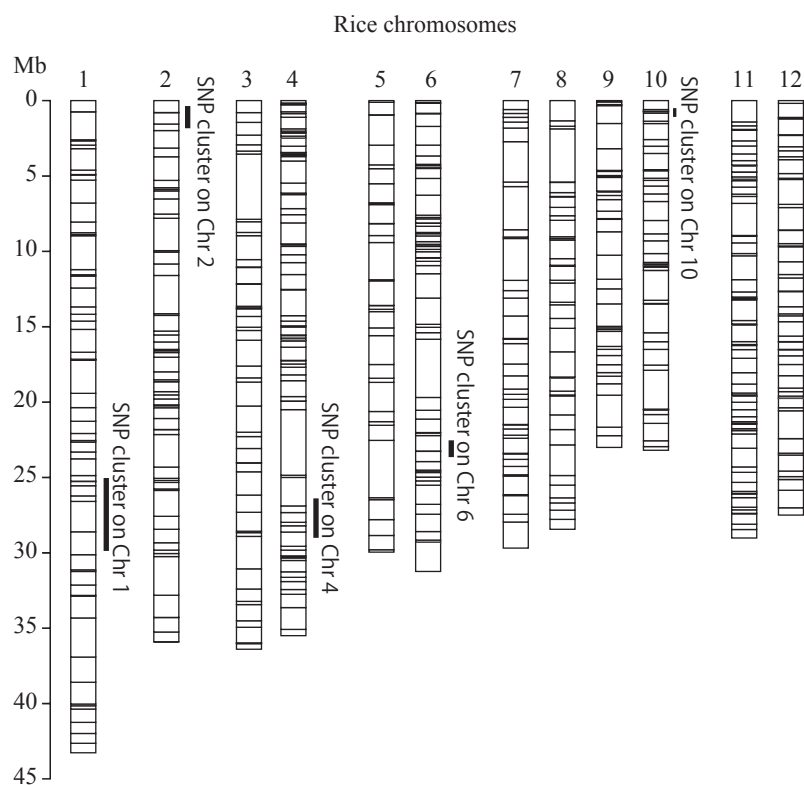

Supplementary Figure S4: Chromosomal positions of five SNP clusters.

Physical map positions of each SNP detected by ddRAD-Seq are specified by horizontal bars in each chromosome. Positions of SNP clusters that exhibited significant differences in allele frequency between early- and late-heading populations are indicated by vertical bars on the right side of each chromosome.

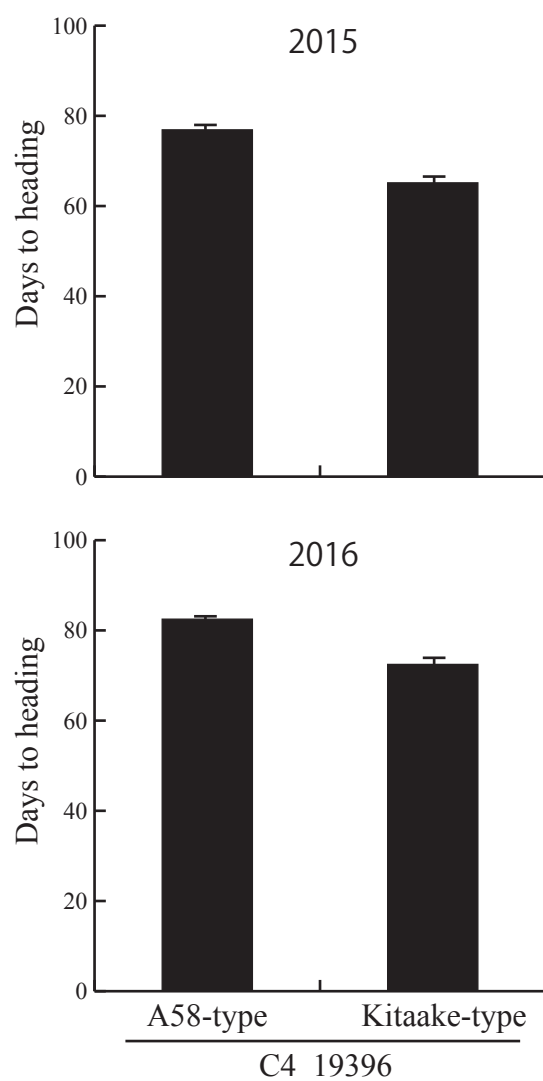

Supplementary Figure S5: Effect of the chromosome 4 SNP cluster on DTH in 2015 and 2016.

Average DTH values of the F4 lines with homozygous A58- and Kitaake-type alleles at the SNP cluster on chromosome 4, which is represented by the central SNP in the cluster, C4\_19396. Significant differences ( $P < 0.01$ ) between average DTH values were observed in 2015 and 2016.

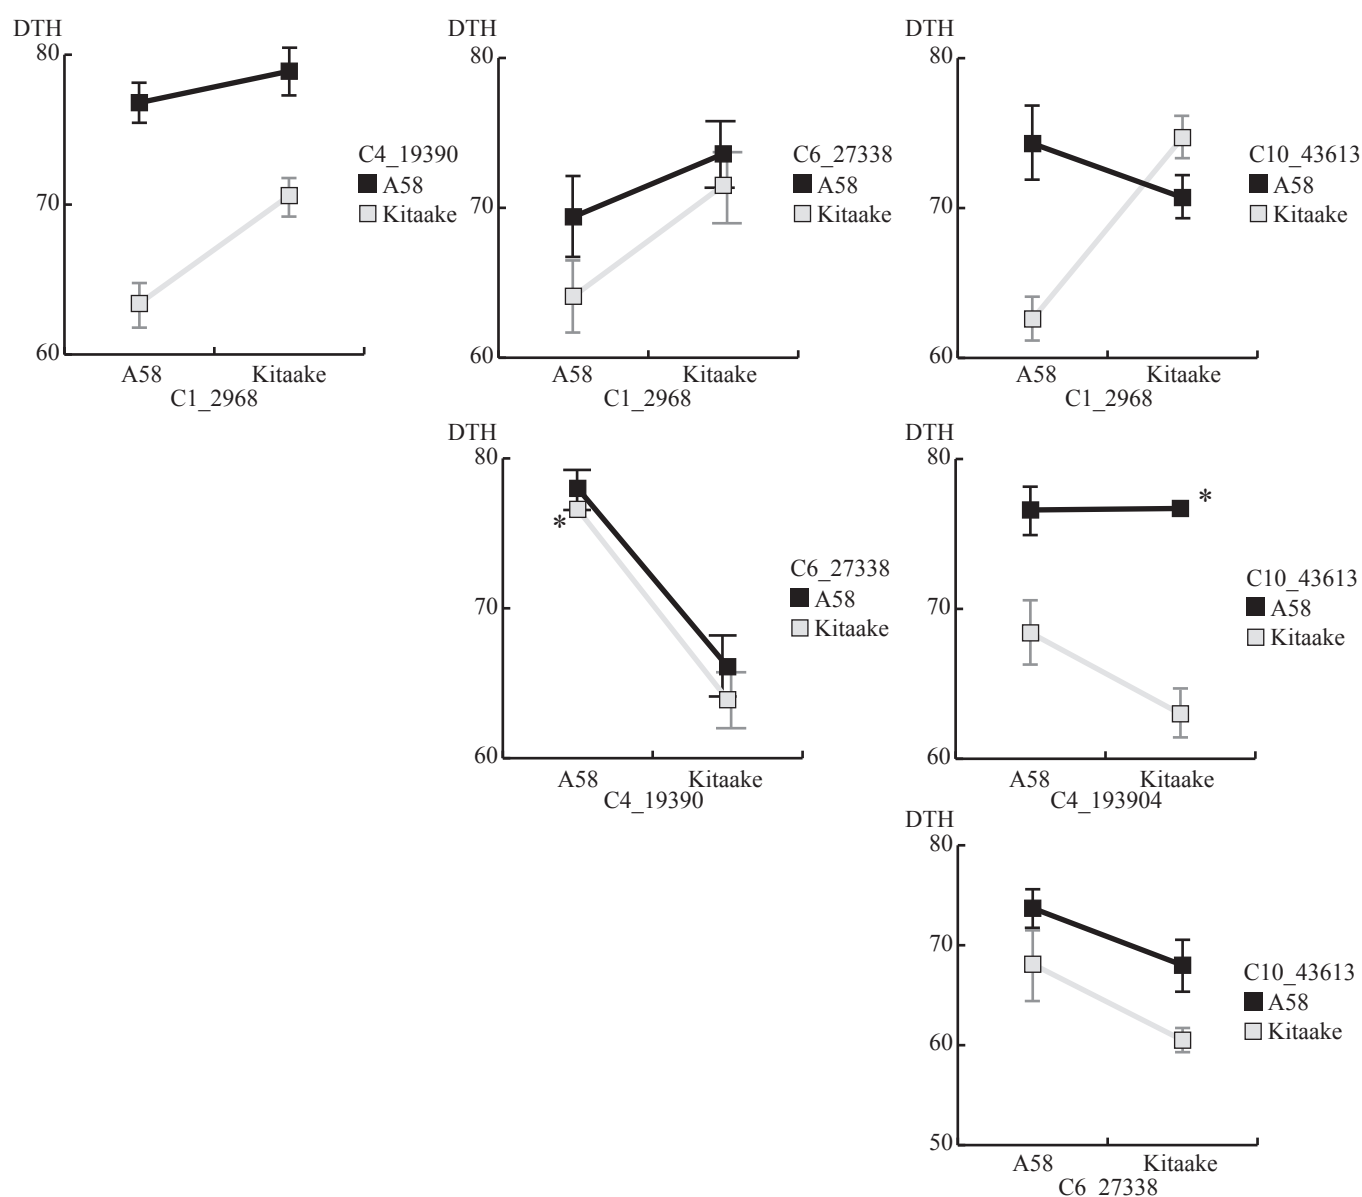

Supplementary Figure S6: Genetic interactions between SNP clusters on chromosomes 1, 4, 6, and 10 relative to DTH in 2015.

Average DTH values (y-axis) of F4 lines with each genotype are presented in squares. Six combinations of any two loci among the SNP clusters on chromosomes 1, 4, 6, and 10 are depicted. The A58-type alleles (black line) and Kitaake-type alleles (gray line) are paired with another locus corresponding to A58-type alleles (left side) or Kitaake-type alleles (right side) (x-axis), respectively. An allelic interaction (non-additive interaction) is indicated by the crossing of the black and gray lines.
